# Supplementary material for: Regional differences in the patient population of general practices in northern Germany: results of a mixed-methods study
Source: PubMed Central journal article supplement — BMJ Open. 2020 Nov 27;10(11):e041762. doi: 10.1136/bmjopen-2020-041762 (PMC7703430; doi:10.1136/bmjopen-2020-041762), 2020-11-27
Supplement: bmjopen-2020-041762.draft_revisions.pdf [file bmjopen-2020-041762.draft_revisions.pdf]

# BMJ Open

BMJ Open is committed to open peer review. As part of this commitment we make the peer review history of every article we publish publicly available.

When an article is published we post the peer reviewers' comments and the authors' responses online. We also post the versions of the paper that were used during peer review. These are the versions that the peer review comments apply to.

The versions of the paper that follow are the versions that were submitted during the peer review process. They are not the versions of record or the final published versions. They should not be cited or distributed as the published version of this manuscript.

BMJ Open is an open access journal and the full, final, typeset and author-corrected version of record of the manuscript is available on our site with no access controls, subscription charges or pay-per-view fees (<http://bmjopen.bmj.com>).

If you have any questions on BMJ Open's open peer review process please email [info.bmjopen@bmj.com](mailto:info.bmjopen@bmj.com)

# BMJ Open

## Regional differences in the patient population of general practices in northern Germany - results of a mixed methods study

|                               |                                                                                                                                                                                                                                                                                                                                                                                                                                                                                                                                                                                                                                                                                                                    |
|-------------------------------|--------------------------------------------------------------------------------------------------------------------------------------------------------------------------------------------------------------------------------------------------------------------------------------------------------------------------------------------------------------------------------------------------------------------------------------------------------------------------------------------------------------------------------------------------------------------------------------------------------------------------------------------------------------------------------------------------------------------|
| Journal:                      | <i>BMJ Open</i>                                                                                                                                                                                                                                                                                                                                                                                                                                                                                                                                                                                                                                                                                                    |
| Manuscript ID                 | bmjopen-2020-041762                                                                                                                                                                                                                                                                                                                                                                                                                                                                                                                                                                                                                                                                                                |
| Article Type:                 | Original research                                                                                                                                                                                                                                                                                                                                                                                                                                                                                                                                                                                                                                                                                                  |
| Date Submitted by the Author: | 17-Jun-2020                                                                                                                                                                                                                                                                                                                                                                                                                                                                                                                                                                                                                                                                                                        |
| Complete List of Authors:     | Hansen, Heike; University Medical Center Hamburg-Eppendorf, Department of Primary Medical Care<br>Schäfer, Ingmar; University Medical Center Hamburg-Eppendorf, Department of Primary Medical Care<br>Pohontsch, Nadine; University Medical Center Hamburg-Eppendorf, Department of Primary Medical Care<br>Kazek, Agata; University Medical Center Hamburg-Eppendorf, Department of Primary Medical Care<br>Hardt, Hanna; University Medical Center Hamburg-Eppendorf, Department of Primary Medical Care<br>Lühmann, Dagmar; University Medical Center Hamburg-Eppendorf, Department of Primary Medical Care<br>Scherer, Martin; University Medical Center Hamburg-Eppendorf, Department of Primary Medical Care |
| Keywords:                     | PRIMARY CARE, QUALITATIVE RESEARCH, EPIDEMIOLOGY                                                                                                                                                                                                                                                                                                                                                                                                                                                                                                                                                                                                                                                                   |
|                               |                                                                                                                                                                                                                                                                                                                                                                                                                                                                                                                                                                                                                                                                                                                    |

SCHOLARONE™  
Manuscripts

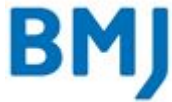

I, the Submitting Author has the right to grant and does grant on behalf of all authors of the Work (as defined in the below author licence), an exclusive licence and/or a non-exclusive licence for contributions from authors who are: i) UK Crown employees; ii) where BMJ has agreed a CC-BY licence shall apply, and/or iii) in accordance with the terms applicable for US Federal Government officers or employees acting as part of their official duties; on a worldwide, perpetual, irrevocable, royalty-free basis to BMJ Publishing Group Ltd ("BMJ") its licensees and where the relevant Journal is co-owned by BMJ to the co-owners of the Journal, to publish the Work in this journal and any other BMJ products and to exploit all rights, as set out in our [licence](#).

The Submitting Author accepts and understands that any supply made under these terms is made by BMJ to the Submitting Author unless you are acting as an employee on behalf of your employer or a postgraduate student of an affiliated institution which is paying any applicable article publishing charge ("APC") for Open Access articles. Where the Submitting Author wishes to make the Work available on an Open Access basis (and intends to pay the relevant APC), the terms of reuse of such Open Access shall be governed by a Creative Commons licence – details of these licences and which [Creative Commons](#) licence will apply to this Work are set out in our licence referred to above.

Other than as permitted in any relevant BMJ Author's Self Archiving Policies, I confirm this Work has not been accepted for publication elsewhere, is not being considered for publication elsewhere and does not duplicate material already published. I confirm all authors consent to publication of this Work and authorise the granting of this licence.

1  
2  
3 Heike Hansen<sup>1\*</sup>, Ingmar Schäfer<sup>1</sup>, Nadine Janis Pohontsch<sup>1</sup>, Agata Kazek<sup>1</sup>, Hanna Hardt<sup>1</sup>, Dagmar  
4 Lühmann<sup>1</sup>, Martin Scherer<sup>1</sup>  
5  
6

7 **Regional differences in the patient population of general practices in northern**  
8 **Germany - results of a mixed methods study**  
9

10  
11  
12  
13  
14 <sup>1</sup> Department of Primary Medical Care, University Medical Center Hamburg-Eppendorf, Hamburg,  
15 Germany  
16

17  
18  
19 \* Corresponding author:  
20

21 Dr. Heike Hansen  
22

23 Department of Primary Medical Care  
24

25 University Medical Center Hamburg-Eppendorf  
26

27 Martinistr. 52  
28

29 20246 Hamburg  
30

31 Germany  
32

33 Phone: ++49-40/7410-57179  
34

35 Fax: ++49-40/7410-53681  
36

37 h.hansen@uke.de  
38  
39

40 **Word count: 5.525**  
41  
42  
43  
44  
45  
46  
47  
48  
49  
50  
51  
52  
53  
54  
55  
56  
57  
58  
59  
60

## Abstract

**Objectives:** The aim of our study was to explore patient types in general practitioner (GP) practices and to quantify the regional differences of the frequencies of these patient types in northern Germany.

**Design and setting:** We conducted a mixed methods study based on focus groups and standardised interviews with GPs. All counties and independent cities within a radius of 120 km around Hamburg were assigned one of three regional categories (urban areas, environs, rural areas). The focus groups were analysed using qualitative content analysis. Relative frequencies of consultations by patient types and differences between the regions were calculated. Logistic regression analyses were used to identify differences among regions.

**Participants:** Nine focus groups with 65 GPs (67.7% male). From the 280 initially recruited GPs 211 (65.4% male) could be personally interviewed.

**Results:** Four themes with 27 patient types were derived from the focus groups: patients classified by morbidity, sociodemographic characteristics, special care needs and patient behaviour. We found significantly higher association for the occurrence of five patient characteristics in urban areas than rural areas: patients with migration background and culturally different disease concepts (OR=1.23; 95% CI 1.06-1.42), privately insured patients (OR=1.17; 95% CI 1.05-1.31), educationally disadvantaged patients with low health literacy (OR=1.11; 95% CI 1.04-1.19), patients with psychiatric disorders (OR=1.07; 95% CI 1.02-1.12) and senior citizens living on their own without caregivers (OR=1.05; 95% CI 1.05-1.31). Three patient types were significantly lower associated: minors accompanied by their parents (OR=0.71; 95%CI 0.61-0.83), patients with poor therapy adherence (OR=0.87, 95% CI 0.80-0.95) and patients with dementia (OR=0.90; 95% CI 0.82-0.99).

**Conclusions:** GPs could compensate the specific needs of their patients with medical training aligned with the requirements of their region. Urban GPs need skills treating patients with psychiatric, social and cultural problems, rural GPs regarding the care for children or incomppliant patients.

### Trial registration:

The study was registered in ClinicalTrials.gov (NCT02558322; <https://clinicaltrials.gov/ct2/show/NCT02558322>).

**Strengths and limitations of this study:**

- GPs who participated in the focus groups may differ from non-participants due to their motivation, practice experience and special problems from their regions, eg. undersupply of physicians.
- For the qualitative part of the study, in order to maximize the heterogeneity of focus group participants' experience we ensured to include both male and female GPs, with longer and shorter durations of practice experience, lower and higher age, from smaller and larger practices and different types of practices from all three areas.
- For the quantitative part of the study GP practices were included via a quota sampling.
- The contributions of the GPs in the focus groups and the answers in the interviews might have been influenced by memory gaps, errors or social desirability.
- The GPs were recruited from the regions of northern Germany exclusively. Therefore the sample may possibly not represent the rest of Germany.

## Background

The number of general practices per population and the supply of certain services vary greatly between urban and rural areas. Urban areas have a better availability of GPs, while rural areas struggle with the impending shortage of medical personnel and services [1, 2]. As a result, general practitioners (GPs) from rural areas see more patients, have a higher total amount of working hours, a higher workload of home visits and they provide a broader spectrum of services [3–7]. Previously published results from our qualitative analyses indicate that GPs from urban and rural areas perceive their professional role differently. Urban GPs assessed themselves just as a provider of medical services whereas rural GPs described themselves as a medical companion with an intensive doctor-patient-relationship [8].

Doctor-patient-relationship and disease management in primary care are influenced by patient characteristics. According to Fenton et al., higher rates of requests for tests, prescriptions and referrals in family medicine practices were significantly associated with age, greater bother or worry about symptoms, a more extroverted patient personality, greater life satisfaction and a higher probability of at least one prior encounter with the physician that had been visited [9]. Ferroni et al. demonstrated that the management of non-insulin-treated type II diabetes was insufficient in younger patients, immigrants and patients not attending diabetes clinics [10]. Van den Bussche et al. analyzed the overutilization of ambulatory medical care in the elderly German population. They identified two main patient types with regard to overutilization of medical services: One type comprised patients belonging to the oldest age group (42 %  $\geq$  75 years), having many practice contacts (1.4 contacts/week), suffering from severe somatic diseases and multimorbidity and needing long-term care. The other type comprised younger elderly (30 %  $\geq$  75 years) suffering from psychiatric or psychosomatic complaints, being less frequently multimorbid and/or nursing care dependent and contacting a large number of different practices [11]. Another study examined self-care coping strategies in people with diabetes. They found three patient types: proactive managers who independently monitor and adjust blood glucose and the self-care regime, passive followers who adhere to the prescribed self-care regime without self-adjustment and nonconformists who do not follow most of the prescribed self-care regime [12].

Some studies took regional differences of the distribution of patient characteristics or patient types into consideration. Mukhtar et al. analyzed factors associated with consultation rates in general practice in England. Consultation rates increased for females, deprived and older patients and varied by ethnicity. They did not find associations between consultation rates and the location of general practices in rural areas [13]. A study by Carr-Hill et al., which was conducted over 25 years ago, identified higher rates of consultations in association with morbidity-specific and sociodemographic

1  
2  
3 determinants such as chronic illness, unemployment, living in partnership and living in urban areas  
4 [14].  
5  
6

7 To the best of our knowledge, there are no studies exploring patient types in primary care and  
8 considering their regional differences in Germany. Our definition of patient types is the combination  
9 of typical characteristics into a characteristic property pattern, which e.g. describes the behaviour,  
10 needs or morbidity of a group of patients. Therefore, the aim of our study was to explore 1) patient  
11 types in GP practices and 2) to quantify the regional differences of the frequencies of these patient  
12 types in northern Germany.  
13  
14  
15  
16  
17

## 18 19 20 **Methods**

### 21 22 **Study design**

23  
24 The investigation presented here is part of the study “Regional variations in primary medical care of  
25 northern Germany - Outpatient Healthcare Research North (*Ambulante Versorgungsforschung Nord -*  
26 *AVFN*)”. This study follows a sequential exploratory design [15] consisting of a qualitative and a  
27 quantitative part. The qualitative part includes an exploratory qualitative focus groups study with GPs  
28 and patients. The quantitative part builds on the qualitative results and comprises a cross-sectional  
29 observational study to quantify regional differences in primary health care in northern Germany. The  
30 methods of this study had been entered in the study register ClinicalTrials.gov (NCT02558322) before  
31 starting the survey and described in the published study protocol [16]. This paper presents the results  
32 of the GP focus groups from the qualitative part and of the GP interviews from the quantitative part  
33 concerning the description of patient types. The study was approved by the Ethics Commission of the  
34 Hamburg Medical Association on 12 August 2013 (file number PV 4535). It was not appropriate or  
35 possible to involve patients or the public in the design, or conduct, or reporting, or dissemination plans  
36 of our research.  
37  
38  
39  
40  
41  
42  
43  
44  
45  
46  
47  
48

### 49 50 **Study regions and regional categories**

51 The study regions and regional categories have been described in previous publications [3, 8, 17]. In  
52 brief, three categories were defined for the regional comparison based on the so-called “structural  
53 settlement of district types” of the German Federal Institute for Research on Building, Urban Affairs  
54 and Spatial Development [18]. The category “urban areas” included independent large cities  
55 constituting districts in their own right, the category “environs” urbanised districts and rural districts  
56 with signs of agglomeration and the category “rural areas” sparsely populated rural districts.  
57  
58  
59  
60



1  
2  
3 The areas of the cross-sectional observational study have been described in the study protocol [16].  
4 All administrative districts (counties and independent cities) were included in the study where at least  
5 20% of the land area was located within a radius of 120 km (ca. 75 miles) linear distance around the  
6 study centre (University Medical Center Hamburg-Eppendorf). The chosen administrative districts for  
7 the study were derived from the German Federal States of Bremen, Hamburg, Mecklenburg-Western  
8 Pomerania, Lower Saxony, Saxony-Anhalt and Schleswig-Holstein. The specific districts and cities are  
9 shown in detail in previous publications [3, 16].  
10  
11  
12  
13  
14  
15  
16  
17

### 18 **Recruitment**

19  
20 GPs were eligible for the study if they had been accredited as statutory health insurance physicians in  
21 the respective administrative districts. Therefore we used the database of the Department of Primary  
22 Medical Care at the University Medical Center Hamburg-Eppendorf as well as the databases of the  
23 respective regional associations of statutory health insurance physicians.  
24  
25  
26

27 For the qualitative focus group study, we contacted GPs from 17 districts and cities (n = 1910). The  
28 GPs were invited by mail to participate in the focus groups. GPs from six cities with populations over  
29 20,000 in the regional category rural areas were excluded in order to avoid a bias by GPs practicing in  
30 larger cities within the rural areas focus groups. For detailed information on the participating districts  
31 and cities of the focus groups see Pohontsch et al. 2018 [8].  
32  
33  
34

35 For the cross-sectional observational study, the GPs were selected by a quota sampling design in order  
36 to represent all regionally different healthcare situations in the study. The purpose of this design was  
37 to raise the probability of also including underserved regions into the study where usually many GPs  
38 were unwilling or unable to participate in a study due to their heavy workload. The goal of the study  
39 was to recruit at least 80 GPs per regional category. The sample was stratified into individual  
40 administrative districts and the sample size in each district was fixed proportionally to the respective  
41 population size. GPs were invited to participate in the study by letter.  
42  
43  
44  
45  
46  
47  
48  
49

### 50 **Data collection**

51  
52 The focus groups took place between May and November 2014 in six different locations to allow  
53 participants from different regions to reach the meeting easily. The focus groups were led by at least  
54 two experienced moderators out of four (HH, IS, NJP and AS). A semi-structured interview guideline  
55 was used and the focus groups lasted approx. 120 minutes. The guideline referred to the main  
56 categories: most common reasons for consultations, patient characteristics, regional differences  
57  
58  
59  
60

1  
2  
3 concerning work of GPs and expectations, needs and treatment requirements. The interview guideline  
4 is published elsewhere [17]. The introductory question regarding the patient types was: "Which kind  
5 of patients consult you most often?". The focus groups were digitally audio recorded, logged and  
6 transcribed verbatim following designated transcription rules by trained research assistants. Field  
7 notes were made during the focus groups by the moderators. HH checked all transcripts for accuracy.  
8 In order to protect participants` identities all names were replaced by numbers and details that would  
9 have enabled the identification of individuals were deleted.

10  
11 The data of the cross-sectional observational study were collected between July 2015 and April 2017.  
12 The GPs were visited by staff members of the project and interviewed personally. Participants  
13 answered by memory recall and were allowed to check their patient documentation if necessary. The  
14 standardised interviews obtained information regarding the GPs personal and professional  
15 characteristics (age, gender, workload, post-graduate and advanced medical training, place of  
16 residence, data on the practice) and the number of weekly contacts with 27 patient types derived  
17 from the focus groups. The interviews included information from home visits and referred to average  
18 practice weeks (no overcrowded weeks, no below average weeks, no flu season). The questionnaire  
19 is presented in the additional file 1. Furthermore we explored the frequency of 99 different reasons  
20 for consultation from 17 areas/ organ systems and 38 different procedures of healthcare services.  
21 These analyses are published elsewhere [3].  
22  
23  
24  
25  
26  
27  
28  
29  
30  
31  
32  
33  
34  
35  
36  
37

### 38 **Data analysis**

39 The transcripts of the focus groups were analysed using qualitative content analysis [19] following a  
40 realistic paradigm [20]. We derived inductive categories from the material. HH, NJP and IS analysed  
41 the transcripts, discussed and consented all categories, category descriptions and examples. Data  
42 were managed using MAXQDA 11 (Verbi GmbH).  
43  
44  
45

46 The quantitative data were prepared and analysed using Stata 15.1. Relative frequencies of  
47 consultations from patient types and differences between the regions urban areas, environs and rural  
48 areas were described and regional differences were analysed using the t-test. The results are  
49 presented as the proportion of the respective categories of patient types of all patients consulting the  
50 respective practice. Significant regional differences were identified by logistic regression analyses via  
51 stepwise backward selection with  $p > 0.05$  as exclusion criterion. We calculated two models comparing  
52 1) urban areas vs. rural areas and 2) environs vs. rural regions. An alpha level of 5% ( $p \leq 0.05$ ) was  
53 defined as statistically significant.  
54  
55  
56  
57  
58  
59  
60

## Patient and public involvement

There was no patient and public involvement in the design, conduct or reporting of our research.

## Results

### Sample characteristics

We conducted nine focus groups with 65 GPs. Three focus groups were performed in each area: urban areas n=24 GPs, environs n=19, rural areas n=22. 44 GPs were male. Mean age of the GPs was 54.3 years in urban areas, 50.6 in environs and 55.0 in rural areas. Further descriptions of the focus groups participants can be found in table 1.

In our standardized observational study, we were able to include GPs from 91.9% of the selected administrative districts (34 of 37) into the data set. In three districts of the region environs (Delmenhorst, Diepholz and Osterholz) we could not include GPs into our study. From the 280 initially recruited GPs 211 could be personally interviewed. 69 GPs could not participate due to time-related or organisational problems (e.g. absence of practice partners, software problems). The description of the recruitment process, the stratification of groups and a map of the regions can be found in Schäfer et al. 2020 [3].

The characteristics of the interviewed GPs are shown in table 2. 65.4% of the GPs were male, the mean age was 54.5 years. The GPs reported an average of 344 treated patients per month with a slightly lower number of patients in urban areas than in rural areas. The most common practice type in all areas was the individual practice (rural areas: 59.2%, environs: 51.4%, urban areas: 43.9%). GPs working in medical care centers were only found in urban areas.

### Patient types identified from the focus groups

We derived 4 themes with 27 categories of patient types from the GP focus groups. The identified patient types are presented in table 3. Quotes from the GPs are shown in italics in the following text.

#### Patient types classified by morbidity

Theme 1 included patient types classified by morbidity. A frequent category was patients with chronic illness, which was divided into two subtypes. One type is rather well, dutiful, easy to manage and with well-adjusted medication. The other type has a poor compliance and needs a time-consuming treatment.

1  
2  
3 *"I think the most frequent patient is the stable, chronically ill old patient and the second most often*  
4 *the sick old patient with severe complaints."* (Section 190, urban GP group)  
5

6 Another category was patients with multimorbidity. These were characterised by the GPs as  
7 presenting regularly with new complaints, having polypharmacy, being in need of patient education  
8 and constant treatment adaptations. GPs also described a high expenditure of time for the  
9 treatment of patients with multimorbidity.  
10  
11

12  
13 *„So [...] really common is the chronically ill old patient, [who] keeps coming up with new symptoms*  
14 *because the joints are damaged, pain occurs again, the medication is not taken properly or is stopped*  
15 *because of some side effects, which are often very, how to say, 'wailing' you cannot say, but are very*  
16 *plaintive. [...] So that's tiring."* (Section 206, urban GP group)  
17

18 Another group of patients that many GPs consider to be common in their practice are patients with  
19 psychiatric disorders, e.g. burnout, depression, anxiety or borderline disorders. According to the  
20 GPs, mental disorders often occur as a comorbidity of somatic diseases. The treatment of these  
21 psychiatric disorders is often stressful because the patients need long and frequent conversations,  
22 many of them repeatedly consult the GP with the same symptoms and some patients have no  
23 insight into the disease. From the GPs' view another frequently encountered patient group were  
24 patients with somatoform disorders. These included e.g. patients with unclear chest, abdominal or  
25 whole body pain or patients with irritable bowel syndrome. The treatment of these patients and the  
26 clarification of their symptoms is time-consuming. GPs reported that it is difficult to convey to the  
27 patient that the complaints are not based on an organic cause. GPs also reported that there are  
28 many people with dementia among their older patients. The contact with relatives or caregivers  
29 plays a major role in the treatment of these patients. Moreover, some GPs have described patients  
30 with substance abuse disorders who are dependent on alcohol, medication such as painkillers or  
31 sleeping pills, or illegal drugs as a common patient type. For some GPs caring for this patient group is  
32 stressful due to frequent consultations, time consuming, and the need to ward off desires for  
33 prescription drugs.  
34  
35  
36  
37  
38  
39  
40  
41  
42  
43  
44

#### 45 Patient types classified by sociodemographic characteristics

46  
47  
48 Theme 2 summarized patient types according to sociodemographic characteristics. GPs mentioned  
49 that they have patients with social problems due to poverty/low income and educationally  
50 disadvantaged patients with low health literacy. These two patient types needed more time-  
51 consuming advice and management. From the perspective of the GPs many patients who are  
52 affected by poverty struggle with addiction and mental problems and/or a bad health condition. In  
53 contrast, GPs reported another category typically for the sociodemographic cluster: privately insured  
54 patients. GPs described them as very demanding.  
55  
56  
57  
58  
59  
60

1  
2  
3 „I saw in [place in Schleswig-Holstein], [...] the community, I think, got three huge containers of dirt  
4 out of this [...] house. It was horrible. And then she sued the communit. After that nobody dared to  
5 help her again. And unfortunately we see her in the emergency service with a regularity. This is  
6 sometimes very appalling and is becoming more frequent, even in areas where you don't think it's  
7 possible.“ (Section 223, rural GP group)

8  
9 „This is more a, actual a claim. Is probably the same as with patients with a lot of money. The private  
10 patient assumes that he basically finances the entire practice with his doctor-patient contact or visit.“  
11 (Section 252, environs GP group)

12  
13 GPs reported that patients with migration background sometimes have very different disease  
14 concepts. Some patients, e.g. Turkish-born patients, have a different understanding of the disease  
15 than other patients due to their origin or culture. This could lead to difficulties in clarifying  
16 symptoms and the assessment of treatment urgency and intensity. GPs needed more time for these  
17 patients. The described problems concern the category patients with migration background and  
18 communication problems as well.

19  
20 „What I find exciting in these groups, what sometimes makes it easier for me e.g. we have quite a lot  
21 Polish pickers with us. Polish pain is very much the same as German pain. So i.e. when [a] Pole says  
22 'my leg hurts'. Then I know roughly how his leg hurts. I don't know about Turkish pain. This [...] is really  
23 a problem. So I know that my Turkish patients get disproportionately more painkillers and more  
24 antibiotics from me and I can't get it, although I know it. I can't reduce it because I fail because of the  
25 language barrier and the way they describe the pain and I can't get it any other way.“ (Section 312,  
26 rural GP group)

27  
28 Further patient categories in this theme were minors accompanied by their parents and minors who  
29 come alone for consultation. These two groups seemed to be rather less common in the GP  
30 practices. Urban GPs reported that children from urban areas were mainly treated by the  
31 paediatrician. Rural GPs described that they treated also children particularly when the paediatrician  
32 practices were very crowded.

### 33 Patient types classified by specific care needs

34  
35 Theme 3 comprised patients with specific care needs. GPs described patients with other social  
36 problems e.g. marital problems, loneliness or workplace bullying. Especially patients suffering from  
37 loneliness influenced the GP practice routine. They came without a special reason for consultation  
38 and used the waiting areas for social contacts with other people.

39  
40 „So, I think it's more of a social problem than a medical problem. That is why they are so often in  
41 the clinic. There they meet people. They usually live alone and have some social contact there  
42 and can just talk.“ (Section 80, rural GP group)

43  
44 Patients regularly needing home visits, patients living in a nursing home or senior citizens living on  
45 their own without caregivers had a special treatment effort in common. GPs took responsibility for  
46 their older patients, they organized their medical treatment which is related to a higher workload.

1  
2  
3 „We just have the very few old people in the nursing home. They have no relatives at all. Nobody cares  
4 anymore. Yes [...] so that we no longer have any contact persons even in help so.“ (Section 1091,  
5 urban GP group)  
6

7 „Sometimes the children are far away and there are often very brave old women who really managed  
8 it alone for years. Giant garden, huge house and all that. Then it just doesn't work anymore, but they  
9 don't want to. Very, very difficult to find a satisfactory solution for everyone, right?“ (Section 244-246,  
10 rural GP group)  
11

12 Patients who are caregivers themselves were described as a vulnerable group with a need of  
13 psychosocial support and a higher risk of developing health problems due to the exhausting care  
14 situation.  
15

16  
17 „So some caring relatives do it very well and you have to treat them too, because they can also get  
18 exhausted and there are very nice circumstances and just terrible ones.“ (Section 206, rural GP group)  
19

20 This theme also included struggling single parents. According to the GPs this group deserves special  
21 attention. Mothers who care for their children alone in addition to a job were overworked, this  
22 complicated the treatment and has a negative effect on their health status.  
23

24  
25 GP A: "As a group of people, I can still think of the group of single mothers [...]."

26 GP B: "Overworked, clearly. Overworked and have problems everywhere. [...] Whatever they do, it will  
27 always be [a] problem. "

28 GP A: "Yes, it is very difficult, so because there are quite a lot of them here and I think that their  
29 situation is quite understandable." (Section 202 bis 204, urban GP group)  
30

### 31 Patient characteristics classified by patient behaviour

32  
33 Theme 4 classified patient types concerning patient's behaviour. Among them are patients who  
34 present for consultation bringing along a self-diagnosis obtained via different media. Some of  
35 these patients had a clear idea of what they have, what they need and what the GP has to do.  
36 These contacts were time consuming, but some of these patients were in a positive way well  
37 informed.  
38

39  
40  
41 „I would differentiate the internet patients again, because I think there are the ones who are really so  
42 annoying and are hypochondriacal in some way. But [...] others [...] are [...] uncomfortable for us  
43 because they often really know details better than we do, because they deal with certain things that  
44 we have already neglected in routine or [things] we are no longer up to date with.“ (Section 160, rural  
45 GP group)  
46

47 A frequently described patient group was the patients with poor therapy adherence. The GPs  
48 complained that these patients do not follow their recommended lifestyle changes e.g. healthy  
49 nutrition, physical education, restrictions in smoking and drinking behaviour or medication  
50 intake. Working with these patients was very frustrating for the GPs. The most frequent  
51 mentioned patient group was the demanding patients. These patients had high expectations  
52 towards their GP. They asked for special services e.g. prolonged sickness certificates,  
53 inappropriate medication, physiotherapy or massages.  
54  
55  
56  
57  
58  
59  
60

1  
2  
3 „The orthopaedic surgeon had no time. He could somehow protect himself and then they end  
4 up with us and "I brought something with me what does that mean"? Than you really notice,  
5 you somehow got a ball in your goal.“ (Section 207, urban GP group)  
6

7 Two patient categories can be summarized as high users: patients who had at least one  
8 consultation per week and patients who regularly make excessive demands on GP's time during  
9 the consultation. These patients consume a lot resources of the GP and their practice  
10 management.  
11  
12

13  
14 „So, there really are patients who are up to twenty times a quarter. [...] Well, they always have  
15 a reason. So, [...] if it's medication, medication questions, blood sampling, interpretation of  
16 results. Then they come from the specialists in order to interpret their results, because that  
17 obviously doesn't take place there. I do not know. Or [because] you want to hear something  
18 about it again.“ (Section 77 bis 79, rural GP group)  
19

20 „These are the ones that are actually scheduled with a quarter of an hour and that just consume  
21 45 minutes regularly and where it is sometimes difficult to slow them down. Often they really  
22 have something. Sure, if it's a tumour patient, you can't him ... or if you want to discuss bullying  
23 at work for the first time, then you can't get rid of them for a moment. But there are some  
24 patients where you know in advance that they basically have nothing and still need three  
25 quarters of an hour.“ (Section 139, environs GP group)  
26

27 Another category concerning patient's behaviour reported by the GPs were patients who  
28 proactively consult additional specialists or different GPs for the same problem. This behaviour  
29 could be also called "doctor (s)hopping". Patients change their GPs or other specialists until they  
30 get the desired medication or diagnosis.  
31  
32

33  
34 „Also the doctor hoppers, who had maybe seven doctors as general practitioners within a year.  
35 And say, 'Oh, we've heard so much beautiful from you'. But they say that to everyone, we know  
36 that, we all know that.“ (Section 174, rural GP group)  
37

38 Theme 4 contained besides these predominantly demanding patients also the regular patients  
39 of the practice. GPs reported that they know many of their regular patients well and the  
40 treatment of patients with a long doctor-patient-relationship is often very satisfying.  
41  
42

43 „But there are also many close [patients] who have been with you for years and who actually  
44 appreciate the experience of the doctor and thus put themselves in my hand, I would also say. If  
45 you've known them for a long time, a lot actually. Where there is a good relationship of trust,  
46 where you can also say clear words, but they are not angry afterwards.“ (Section 155, rural GP  
47 group)  
48

#### 49 **Frequencies and regional differences of patient types**

50  
51 The relative frequency of consultation by the 27 categories of patient types in the total sample,  
52 urban areas, environs and rural areas is shown in table 4. Percentages relate to all patients seen  
53 in the practices and are averaged across all GPs interviewed, in the total sample as well as in  
54 the specified regions respectively. The most common patient types were, besides the "regular  
55 patients of the practice" (85.2%), "patients with a chronic illness" (57.7%) and – probably largely  
56 overlapping with this category – "patients with multimorbidity" (45.9%). In bivariate analyses,  
57  
58  
59  
60

1  
2  
3 many patient types had a higher frequency in urban areas compared to in rural areas. The  
4 biggest differences were found for “patients with psychiatric disorders” (19.2% in urban areas  
5 vs. 12.5% in rural areas), “educationally disadvantaged patients with low health literacy” (15.8%  
6 vs. 9.1%), and “senior citizens living on their own without caregivers” (16.0% vs. 11.2%). In  
7 contrast, “minors accompanied by their parents” was the only patient type significantly higher  
8 stated in rural areas (3.1% vs. 6.3%).  
9

10  
11  
12  
13  
14 The results of the two logistic regression models are shown in the tables 5 and 6. Five patient  
15 types were identified by stepwise backward selection to be associated with urban areas in  
16 comparison to rural areas. The highest positive association was found for “patients with  
17 migration background and culturally different disease concepts” (odds Ratio: 1.23; 95%  
18 confidence interval: 1.06-1.42), “privately insured patients” (1.17; 1.05-1.31) and “educationally  
19 disadvantaged patients with low health literacy” (1.11; 1.04-1.19). Three patient types were  
20 identified with significant negative association between urban areas and rural areas. These  
21 included “minors accompanied by their parents” (0.71; 0.61-0.83), “patients with poor therapy  
22 adherence” (0.87; 0.80-0.95) and “patients with dementia” (0.90; 0.82-0.99). The logistic  
23 regression model concerning the comparison of environs and rural areas revealed two  
24 categories with positive association: “Privately insured patients” (1.10; 1.03-1.18), “patient who  
25 proactively consult additional specialists for the same problem” (1.06; 1.01-1.12) and one with  
26 negative association: “patients who are caregivers” (0.91; 0.83-0.99).  
27  
28  
29  
30  
31  
32  
33  
34  
35  
36  
37  
38

## 39 Discussion

### 40 Main findings

41  
42 We derived 27 categories of patient types from the GP focus groups. This patient types could be  
43 assigned to four themes: morbidity, sociodemographic characteristics, specific care needs and patient  
44 behaviour. GPs from urban areas deal with higher frequencies of patients with psychiatric, social and  
45 cultural problems. Furthermore, patients with low health literacy, senior citizens living alone and  
46 patients who proactively consult additional specialists were represented more often in urban areas.  
47 Only minors accompanied by their parents were more common in rural areas. We found significant  
48 positive association for the occurrence of five patient types in urban areas than rural areas. Three  
49 patient types were significantly negative associated with the occurrence in GP practices in urban areas  
50 than rural areas.  
51  
52  
53  
54  
55  
56  
57  
58  
59  
60



### Strengths and limitations

As far as we know this is the first mixed method study exploring patient types in GP practices and quantifying and comparing the frequencies of these patient types seen in urban, environ and rural GP practices in northern Germany. In order to maximize the heterogeneity of focus group participants' experience in the qualitative part of the study, we ensured to include both male and female GPs, with longer and shorter durations of practice experience, lower and higher age, from smaller and larger practices and different types of practices from all three areas. Nevertheless, GPs who participated in the focus groups could differ from non-participants due to their motivation, practice experience and special problems from their regions. This could possibly have biased our identified patient types. However, we could include a large variety and high number of focus group participants in our study. The GPs were exclusively from the regions of northern Germany so that the sample might possibly not represent the rest of Germany. On the other hand GP practices had been included via a quota sampling into the quantitative part of the study. 91.9% of the administrative districts in the survey area could be included and GPs of less favoured areas which are difficult to reach by public transport, were also represented in the study.

The contributions of the GPs in the focus groups and the answers in the interviews might have been influenced by memory gaps, errors or social desirability. The order of the questions of the focus group guideline may influenced the answers of the GPs regarding the patient types. Before we asked which kind of patients consult them most often to initiate a discussion about patient types, we asked the GPs to describe the most common reasons for consultations in their practice, eg, chronic back pain or acute infections of the respiratory tract. This could have led the discussion in a certain direction. Nevertheless, we decided the order of the questions to focus in the patient type part on patient characteristics which describes the behaviour, needs or morbidity of a group of patients and not only the reasons for consultations in general practice. Our focus group discussions were supported by at least two experienced moderators out of four (IS, NJP, HH and AS). The interviewers of the quantitative GP interviews had received substantial training and had been supervised in regular meetings throughout the entire study period to minimize the interviewer bias. Additionally, it should be noted that our study had a mixed methods design which combined the advantages of qualitative and quantitative data.

### Comparison with literature and discussion of results

Some studies dealt with the influence of patient characteristics on consultation length or high frequencies in general practice. Characteristics associated with a higher use of consultation frequency

1  
2  
3 were among other things female sex, higher age, unemployment, poverty, living alone or isolation,  
4 but regional differences of the distribution of these patient characteristics were regularly not  
5 considered [21–24]. Carr-Hill et al. found higher rates of consultations for patients living in urban areas  
6 [14]. Whereas a study of Mukhtar et al. did not find significant association for practice rurality status  
7 [13].  
8  
9

10  
11  
12 A German study about differences in the provision of lifestyle counselling for cardiovascular disease  
13 prevention between urban and rural regions reported that rural GPs named more often a lack of  
14 adherence by the patients and urban GPs were more often confronted with patients with a migration  
15 background, communication problems and culturally different disease concepts as well [25]. We were  
16 able to confirm these results in our study.  
17  
18

19  
20  
21 GPs from urban areas more often deal with language problems and culturally different disease  
22 concepts due to higher proportions of patients with migration background in cities [25, 26].  
23 Furthermore GPs from urban areas of our study reported higher frequencies of patients with  
24 psychiatric disorders. Two reviews about urban-rural differences in depression showed similar results  
25 for the most reviewed studies as well. However, studies conducted in China revealed higher  
26 prevalence of depression among rural residents [27, 28]. Breslau et al. used a large nationally  
27 representative sample from the United States and suggest that the prevalence of mental disorders did  
28 not differ between urban and rural areas [29]. Other studies reported a higher prevalence of  
29 psychiatric disorders in urban areas [30–33]. Poor mental health is associated with poverty as well as  
30 migration [34, 35]. Our previous paper about the regional differences in reasons for consultation and  
31 GP's service spectrum showed higher frequencies of social problems and psychosomatic basic care for  
32 patients in urban areas [3]. This accumulation of psychosocial patient problems in urban areas  
33 represents a big challenge for urban GPs.  
34  
35  
36  
37  
38  
39  
40  
41  
42

43  
44 The here presented study found a significant negative association between urban areas and rural areas  
45 for patients with dementia. Koller et al. reported regional variations between urban and rural patients  
46 with dementia concerning the specialist treatment after the incident diagnosis of dementia. While  
47 urban patients more often consult neurologists and psychiatrists (NPs) in the year before and after  
48 the initial dementia diagnosis, rural patients tend to contact their primary care physicians more often  
49 but less NPs [36]. This means a cumulative workload for rural GPs as regards the treatment of patients  
50 with dementia.  
51  
52  
53

54  
55 Our study revealed higher frequencies of minors accompanied by their parents in GP practices in rural  
56 areas. Another study from Germany arrived at the same result. 13.5% of family practices from major  
57  
58  
59  
60

1  
2  
3 cities provided care for infants compared to 26.5% of surgeries in medium-sized towns and 37.5% in  
4 small towns or rural areas [37].  
5  
6  
7  
8  
9

### 10 11 **Implications for research and clinical practice** 12

13 An analysis of the Zi-practice-panel (ZiPP) from the Central Research Institute of Ambulatory Health  
14 Care in Germany (Zi) in 2015 showed a higher income for GPs from rural areas than urban areas in  
15 Germany. The main reason was the size of the practices. Rural GPs treated 1,161 patients in the fourth  
16 quarter of 2015, while their colleagues in the city treated 1,047 patients. Furthermore, the rural GPs  
17 worked 2 hours per week more than the urban GPs [38]. Our study also showed that the GPs from  
18 urban areas treated less patients than their colleagues from rural areas. However, they managed  
19 higher frequencies of patients with psychiatric, social and culturally problems which can be very  
20 complex and time consuming. In addition, urban GPs often just act as a providers of medical services  
21 [8] and their patients have a lower commitment [39]. Further research is needed to explore these  
22 differences particularly related to the entire German territory.  
23  
24  
25  
26  
27  
28  
29

30 The identified regional differences should also be included as learning content in the training of  
31 medical students and young GPs. Thus, future GPs could compensate the specific needs of their  
32 patient clientele with medical training aligned with the requirements of the region. For example, the  
33 training for GPs from urban areas should put an emphasis on the treatment of patients with  
34 psychiatric, social and cultural problems. Whereas rural GPs need advanced skills regarding the care  
35 for children or incomppliant patients. Although, in principle, GPs from both areas have to deal with all  
36 these challenges, a regionally adjusted training could facilitate a better response to regional  
37 challenges in health care.  
38  
39  
40  
41  
42  
43  
44  
45  
46  
47  
48  
49  
50  
51  
52  
53  
54  
55  
56  
57  
58  
59  
60

### **Additional files**

Additional file 1: Questionnaire on patient types

### **List of abbreviations**

DEGAM: German Association of General Medicine and Family Medicine; GP: General practitioner; NPS: neurologists and psychiatrists; ZiPP: Zi-practice-panel;

### **Declarations**

#### **Ethics approval and consent to participate**

The study was approved by the Ethics Commission of the Hamburg Medical Association on 12 August 2013 (file number PV 4535). All study participants gave their written informed consent prior to their participation in the study.

#### **Availability of data and material**

The ethics approval does not allowed data sharing.

#### **Authors' information**

HH, certified health scientist, Dr. rer. hum. biol. (PhD); IS, certified sociologist, Dr. phil. (PhD); NJP, certified psychologist, Dr. rer. hum. biol. (PhD); AK, certified health scientist; HHa, certified ecotrophologist; DL, MD, Dr. med. (PhD); MS, GP, MD, professor

#### **Competing interests**

The authors declare that they have no competing interests.

#### **Funding**

The study was supported by the Hamburg and Schleswig-Holstein Association of Statutory Health Insurance Physicians (grant number KVHH-KVSH-2015/1). The funding body had no role in the design of the study and collection, analysis, and interpretation of data and in writing the manuscript.

#### **Authors' contributions**

1  
2  
3 MS, IS, NJP and HH conceived and designed the study. HHa, NJP and IS facilitated the focus groups and  
4 analysed qualitative data. IS analysed the quantitative data. DL, AK and HHa significantly contributed  
5 to the study design and/or discussion of the study results. HH and IS drafted the manuscript. All the  
6 authors commented on the draft and read and approved the final version of the manuscript.  
7  
8  
9

## 10 11 12 **Acknowledgement**

13  
14 We would like to express our appreciation to the numerous GPs who facilitated this study with their  
15 participation and Anne Stark for filling in as moderator of focus groups in times of need.  
16  
17

## 18 19 20 **Open Access**

21  
22 This is an Open Access article distributed in accordance with the Creative Commons Attribution Non  
23 Commercial (CC BY-NC 4.0) license, which permits others to distribute, remix, adapt, build upon this  
24 work noncommercially, and license their derivative works on different terms, provided the original  
25 work is properly cited and the use is non-commercial. See: <http://creativecommons.org/licenses/by-nc/4.0/>  
26  
27  
28  
29  
30  
31  
32  
33

## 34 35 **REFERENCES**

- 36 1 Albrecht M, Etgeton S, Ochmann RR. Faktencheck Gesundheit - Regionale Verteilung von  
37 Arztsitzen (Ärztedichte) - Haus-, Kinder-, Frauen- und Augenärzte. Available at:  
38 [https://www.bertelsmann-](https://www.bertelsmann-stiftung.de/fileadmin/files/BSt/Publikationen/GrauePublikationen/GP_Faktencheck_Gesundheit_Aerztedichte.pdf)  
39 [stiftung.de/fileadmin/files/BSt/Publikationen/GrauePublikationen/GP\\_Faktencheck\\_Gesundhe](https://www.bertelsmann-stiftung.de/fileadmin/files/BSt/Publikationen/GrauePublikationen/GP_Faktencheck_Gesundheit_Aerztedichte.pdf)  
40 [it\\_Aerztedichte.pdf](https://www.bertelsmann-stiftung.de/fileadmin/files/BSt/Publikationen/GrauePublikationen/GP_Faktencheck_Gesundheit_Aerztedichte.pdf) Accessed March 18, 2016.
- 41 2 Weinhold I, Gurtner S. Understanding shortages of sufficient health care in rural areas. *Health*  
42 *Policy* 2014;118(2):201–14.  
43 <http://www.sciencedirect.com/science/article/pii/S0168851014001997>.
- 44 3 Schäfer I, Hansen H, Ruppel T, et al. Regional differences in reasons for consultation and  
45 general practitioners' spectrum of services in northern Germany – results of a cross-sectional  
46 observational study. *BMC Fam Pract* 2020;21(1):1–12.  
47 <https://bmcfampract.biomedcentral.com/track/pdf/10.1186/s12875-020-1093-6>.
- 48 4 Steinhäuser J, Jäkel K, Szecsenyi J, et al. Prozeduren, die in der Allgemeinmedizin durchgeführt  
49 werden – eine Querschnittstudie. *Gesundheitswesen* 2017;79(12):1004–11.
- 50 5 Steinhäuser J, Joos S, Szecsenyi J, et al. A comparison of the workload of rural and urban  
51 primary care physicians in Germany: analysis of a questionnaire survey. *BMC family practice*  
52 2011;12:112.
- 53 6 Pochert M, Voigt K, Bortz M, et al. The workload for home visits by German family  
54 practitioners: an analysis of regional variation in a cross-sectional study. *BMC family practice*  
55 2019;20(1):3.
- 56 7 Wenghofer EF, Kam SM, Timony PE, et al. Geographic variation in FP and GP scope of practice  
57 in Ontario: Comparative provincial study. *Can Fam Physician* 2018;64(6):e274-e282.  
58  
59  
60

- 1  
2  
3 8 Pohontsch NJ, Hansen H, Schäfer I, et al. General practitioners' perception of being a doctor in  
4 urban vs. rural regions in Germany - A focus group study. *Fam Pract* 2018;35(2):209–15.  
5 9 Fenton JJ, Magnan EM, Jerant A, et al. Patient Characteristics Associated with Making Requests  
6 during Primary Care Visits. *The Journal of the American Board of Family Medicine*  
7 2019;32(2):201–08. <https://www.jabfm.org/content/32/2/201>.  
8 10 Ferroni E, Casotto V, Pigato M, et al. Patient and General Practitioner characteristics  
9 influencing the management of non-insulin-treated diabetes mellitus: A cross-sectional study  
10 in Italy. *Diabetes Res Clin Pract* 2016;116:192–201.  
11 11 van den Bussche H, Kaduszkiewicz H, Schäfer I, et al. Overutilization of ambulatory medical  
12 care in the elderly German population?--An empirical study based on national insurance claims  
13 data and a review of foreign studies. *BMC Health Serv Res* 2016;16:129.  
14 12 Collins MM, Bradley CP, O'Sullivan T, et al. Self-care coping strategies in people with diabetes:  
15 a qualitative exploratory study. *BMC Endocr Disord* 2009;9:6.  
16 13 Mukhtar TK, Bankhead C, Stevens S, et al. Factors associated with consultation rates in general  
17 practice in England, 2013-2014: a cross-sectional study. *Br J Gen Pract* 2018;68(670):e370-  
18 e377.  
19 14 Carr-Hill RA, Rice N, Roland M. Socioeconomic determinants of rates of consultation in general  
20 practice based on fourth national morbidity survey of general practices. *BMJ (Clinical research  
21 ed.)* 1996;312(7037):1008–12.  
22 15 Creswell JW, Plano Clark VL. Designing and conducting mixed methods research, 2nd edn. Los  
23 Angeles, London, New Dehli, Singapore, Washington DC: Sage 2011.  
24 16 Schäfer I, Hansen H, Pohontsch N, et al. Regional variation of patient behaviour and reasons for  
25 consultation in the general practice of Northern Germany: protocol for an observational study.  
26 *BMJ open* 2016;6(6):e010738. <http://bmjopen.bmj.com/content/6/6/e010738> (accessed 1 Jul  
27 2016).  
28 17 Hansen H, Pohontsch NJ, Bole L, et al. Regional variations of perceived problems in ambulatory  
29 care from the perspective of general practitioners and their patients - an exploratory focus  
30 group study in urban and rural regions of northern Germany. *BMC family practice*  
31 2017;18(1):68. <https://doi.org/10.1186/s12875-017-0637-x> (accessed 3 Apr 2019).  
32 18 BBSR Homepage - Siedlungsstrukturelle Kreistypen - Laufende Raumbbeobachtung -  
33 Raumbbegrenzungen. Available at:  
34 <https://www.bbsr.bund.de/BBSR/DE/Raumbbeobachtung/Raumbbegrenzungen/SiedlungsstrukturelleGebietstypen/Kreistypen/kreistypen.html> Accessed May 27, 2019.  
35 19 Mayring P. Qualitative Inhaltsanalyse: Grundlagen und Techniken. s.l.: Beltz Verlagsgruppe  
36 2010.  
37 20 Potter J, Wetherell M. Discourse and social psychology: Beyond attitudes and behaviour.  
38 London: Sage 1997.  
39 21 Stevens S, Bankhead C, Mukhtar T, et al. Patient-level and practice-level factors associated with  
40 consultation duration: a cross-sectional analysis of over one million consultations in English  
41 primary care. *BMJ open* 2017;7(11):e018261.  
42 22 Britt HC, Valenti L, Miller GC. Determinants of consultation length in Australian general  
43 practice. *Med J Aust* 2005;183(2):68–71.  
44 23 Scaife B, Gill P, Heywood P, et al. Socio-economic characteristics of adult frequent attenders in  
45 general practice: secondary analysis of data. *Fam Pract* 2000;17(4):298–304.  
46 24 Dreyer K, Steventon A, Fisher R, et al. The association between living alone and health care  
47 utilisation in older adults: a retrospective cohort study of electronic health records from a  
48 London general practice. *BMC Geriatr* 2018;18(1):269.  
49 25 Görig T, Diehl K, Herr RM, et al. Stadt-Land-Unterschiede im Angebot von Lebensstilberatung  
50 zur Prävention kardiovaskulärer Erkrankungen in der Hausarztpraxis. Ergebnisse einer  
51 bundesweiten Hausärztebefragung. *Gesundheitswesen* 2016;78(8-09):533–38.  
52  
53  
54  
55  
56  
57  
58  
59  
60

- 1  
2  
3 26 Ausländeranteil in Deutschland nach Bundesländern 2018 | Statista 2020. Available at:  
4 [https://de.statista.com/statistik/daten/studie/254889/umfrage/auslaenderanteil-in-](https://de.statista.com/statistik/daten/studie/254889/umfrage/auslaenderanteil-in-deutschland-nach-bundeslaendern/)  
5 [deutschland-nach-bundeslaendern/](https://de.statista.com/statistik/daten/studie/254889/umfrage/auslaenderanteil-in-deutschland-nach-bundeslaendern/) Accessed April 02, 2020.  
6  
7 27 Sampson L, Ettman CK, Galea S. Urbanization, urbanicity, and depression: a review of the  
8 recent global literature. *Curr Opin Psychiatry* 2020;33(3):233–44.  
9 28 Purtle J, Nelson KL, Yang Y, et al. Urban-Rural Differences in Older Adult Depression: A  
10 Systematic Review and Meta-analysis of Comparative Studies. *Am J Prev Med* 2019;56(4):603–  
11 13.  
12 29 Breslau J, Marshall GN, Pincus HA, et al. Are mental disorders more common in urban than  
13 rural areas of the United States? *J Psychiatr Res* 2014;56:50–55.  
14 30 Paykel ES, Abbott R, Jenkins R, et al. Urban-rural mental health differences in great Britain:  
15 findings from the national morbidity survey. *Psychol Med* 2000;30(2):269–80.  
16 31 Peen J, Schoevers RA, Beekman AT, et al. The current status of urban-rural differences in  
17 psychiatric disorders. *Acta Psychiatr Scand* 2010;121(2):84–93.  
18 32 Szöke A, Charpeaud T, Galliot A-M, et al. Rural-urban variation in incidence of psychosis in  
19 France: a prospective epidemiologic study in two contrasted catchment areas. *BMC Psychiatry*  
20 2014;14:78.  
21 33 Gruebner O, Rapp MA, Adli M, et al. Cities and Mental Health. *Dtsch Arztebl Int*  
22 2017;114(8):121–27.  
23 34 Kluge U, Rapp MA, Mehran N, et al. Poverty, migration and mental health. *Nervenarzt*  
24 2019;90(11):1103–08.  
25 35 Fryers T, Melzer D, Jenkins R. Social inequalities and the common mental disorders: a  
26 systematic review of the evidence. Germany 2003 May.  
27 36 Koller D, Eisele M, Kaduskiewicz H, et al. Ambulatory health services utilization in patients  
28 with dementia - Is there an urban-rural difference? *Int J Health Geogr* 2010;9:59.  
29 37 Herrmann W J, Berlt B, Spengler V, et al. Do Family Physicians in Germany Practices Treat  
30 Children and Adolescents? A Representative Survey among Family Practices in Berlin and  
31 Brandenburg. *Z Allg Med* 2018(94):390–95.  
32 38 Hausärzte auf dem Land: Höherer Verdienst bei mehr Stunden und höherem Stundensatz  
33 2020.000Z. Available at: [https://www.zi.de/presse/archiv/pressemitteilungen/2018/31-](https://www.zi.de/presse/archiv/pressemitteilungen/2018/31-oktober-2018/)  
34 [oktober-2018/](https://www.zi.de/presse/archiv/pressemitteilungen/2018/31-oktober-2018/) Accessed May 07, 2020.  
35 39 Heike Hansen, Ingmar Schäfer, Sarah Porzelt, et al. Regional and patient-related factors  
36 influencing the willingness to use general practitioners as coordinators of the treatment in  
37 northern Germany - results of a cross-sectional observational study: In Review 2020.  
38 <https://www.researchsquare.com/article/rs-16085/v1.pdf>.  
39  
40  
41  
42  
43  
44  
45  
46  
47  
48  
49  
50  
51  
52  
53  
54  
55  
56  
57  
58  
59  
60

## Tables

**Table 1: Description of participating GPs from the focus groups (n=65)**

|                                | Urban areas | Environs   | Rural areas |
|--------------------------------|-------------|------------|-------------|
| Age (in years):                | 54.3 ± 7.7  | 50.6 ± 8.8 | 55.0 ± 9.7  |
| Sex:                           |             |            |             |
| - female                       | 6           | 5          | 10          |
| - male                         | 18          | 14         | 12          |
| Number of patients per month : |             |            |             |
| - up to 250 patients           | 42%         | 5%         | 9%          |
| - 251 patients and more        | 58%         | 95%        | 91%         |
| Years of practice experience:  | 17.4 ± 10.0 | 12.4 ± 9.4 | 15.4 ± 9.2  |
| Type of medical practice:      |             |            |             |
| - individual practice          | 25.0%       | 52.6%      | 50.0%       |
| - group practice               | 54.2%       | 42.1%      | 36.4%       |
| - joint practice               | 20.8%       | 5.3%       | 13.6%       |

**Table 2: Description of the interviewed GPs from the cross-sectional observational study (n=211)**

|                                             | Total                 | Urban areas                                     | Environs             | Rural areas                                     | p (U/R)             | p (E/R) |
|---------------------------------------------|-----------------------|-------------------------------------------------|----------------------|-------------------------------------------------|---------------------|---------|
| Age (in years):                             | 54.5 ± 8.6<br>(n=207) | 53.5 ± 7.8<br>(n=66)                            | 54.7 ± 8.6<br>(n=72) | 55.4 ± 9.2<br>(n=69)                            | 0.190               | 0.630   |
| Sex:                                        |                       |                                                 |                      |                                                 |                     |         |
| - female                                    | 34.6%                 | 45.5%                                           | 27.0%                | 32.4%                                           | 0.117               | 0.479   |
| - male                                      | 65.4%<br>(n=211)      | 54.6%<br>(n=66)                                 | 73.0%<br>(n=74)      | 67.6%<br>(n=71)                                 |                     |         |
| <b><i>Number of patients per month:</i></b> | 344 ± 115<br>(n=207)  | <b><i>314 ± 101</i></b><br><b><i>(n=65)</i></b> | 345 ± 96<br>(n=74)   | <b><i>372 ± 140</i></b><br><b><i>(n=68)</i></b> | <b><i>0.007</i></b> | 0.172   |
| <b><i>Type of medical practice:</i></b>     |                       |                                                 |                      |                                                 |                     |         |
| - <b><i>individual practice</i></b>         | 51.7%                 | <b><i>43.9%</i></b>                             | 51.4%                | <b><i>59.2%</i></b>                             | <b><i>0.004</i></b> | 0.074   |
| - <b><i>group practice</i></b>              | 6.2%                  | <b><i>12.1%</i></b>                             | 6.8%                 | -                                               |                     |         |
| - <b><i>joint practice</i></b>              | 40.8%                 | <b><i>39.4%</i></b>                             | 41.9%                | <b><i>40.9%</i></b>                             |                     |         |
| - <b><i>medical care centre</i></b>         | 1.4%<br>(n=211)       | <b><i>4.6%</i></b><br>(n=66)                    | -<br>(n=74)          | -<br>(n=71)                                     |                     |         |

U/R: comparison "urban areas" vs. "rural areas"; E/R: comparison "environs" vs. "rural areas"  
Statistically significant results ( $p \leq 0.05$ ) are shown in bold and italic



**Table 3: Identified themes and categories of patients types in GP practices from focus groups****Theme 1: Morbidity**

- Patients with a chronic illness
- Patients with multimorbidity (ie, at least 2 chronic diseases)
- Patients with psychiatric disorders (eg, depression, burnout, anxiety, borderline disorder)
- Patients with somatoform disorders
- Patients with dementia
- Patients with substance abuse disorders

**Theme 2: Sociodemographic characteristics**

- Educationally disadvantaged patients with low health literacy
- Privately insured patients (ie, patients who are insured outside of Germany's statutory health insurance system)
- Patients with social problems due to poverty/low income
- Minors accompanied by their parents
- Patients with migration background and culturally different disease concepts
- Patients with migration background and communication problems
- Minors who come to consultation on their own

**Theme 3: Specific care needs**

- Senior citizens living on their own without caregivers
- Patients with other social problems (eg, marital problems, loneliness, workplace bullying)
- Patients regularly needing home visits
- Patients living in a nursing home
- Patients who are caregivers
- Struggling single parents

**Theme 4: Patient behaviour**

- Regular patients of the practice (as opposed to patients who consulted the GP only once or only if the regular GP practice is closed)
- Patients, who come with self-diagnoses via media (eg, internet, magazines, television)
- Patients with poor therapy adherence (eg, regarding medication, lifestyle changes)
- Demanding patients (eg, patients requesting prolonged sick certificates, inappropriate medication or physiotherapy)
- Patients who regularly make excessive demands on GP's time
- Patients who proactively consult additional specialists for the same problem
- Frequent attenders (ie, at least one consultation per week)
- Patients who proactively consult different GPs because of the same problem

**Table 4: Relative frequencies of the consultations by categories of patient types in GP practices divided by region<sup>MA</sup>**

|                                                                                       | Total<br>(n=210) | Urban<br>areas<br>(n=65) | Environs<br>(n=74) | Rural<br>areas<br>(n=71) | p (U/R)          | p (E/R)      |
|---------------------------------------------------------------------------------------|------------------|--------------------------|--------------------|--------------------------|------------------|--------------|
| <b>Theme 1: Morbidity</b>                                                             |                  |                          |                    |                          |                  |              |
| - Patients with a chronic illness                                                     | 57.7%            | 57.2%                    | 57.3%              | 58.6%                    | 0.662            | 0.680        |
| - Patients with multimorbidity                                                        | 45.9%            | 47.4%                    | 43.3%              | 47.2%                    | 0.953            | 0.224        |
| - <b>Patients with psychiatric disorders</b>                                          | 14.7%            | <b>19.2%</b>             | 12.8%              | <b>12.5%</b>             | <b>0.002</b>     | 0.839        |
| - Patients with somatoform disorders                                                  | 14.4%            | 15.6%                    | 14.6%              | 13.0%                    | 0.175            | 0.464        |
| - Patients with dementia                                                              | 6.4%             | 5.7%                     | 7.1%               | 6.3%                     | 0.549            | 0.417        |
| - <b>Patients with substance abuse disorders</b>                                      | 5.6%             | <b>7.2%</b>              | 5.2%               | <b>4.5%</b>              | <b>0.017</b>     | 0.441        |
| <b>Theme 2: Sociodemographic characteristics</b>                                      |                  |                          |                    |                          |                  |              |
| - <b>Educationally disadvantaged patients with low health literacy</b>                | 10.9%            | <b>15.8%</b>             | 8.4%               | <b>9.1%</b>              | <b>0.004</b>     | 0.666        |
| - <b>Privately insured patients</b>                                                   | 8.4%             | 9.3%                     | <b>9.4%</b>        | <b>6.6%</b>              | 0.074            | <b>0.007</b> |
| - <b>Patients with social problems due to poverty/low income</b>                      | 5.9%             | <b>8.7%</b>              | 4.2%               | <b>5.3%</b>              | <b>0.020</b>     | 0.270        |
| - <b>Minors accompanied by their parents</b>                                          | 4.8%             | <b>3.1%</b>              | 5.0%               | <b>6.3%</b>              | <b>&lt;0.001</b> | 0.139        |
| - <b>Patients with migration background and culturally different disease concepts</b> | 3.9%             | <b>6.5%</b>              | 3.0%               | <b>2.5%</b>              | <b>&lt;0.001</b> | 0.492        |
| - <b>Patients with migration background and communication problems</b>                | 3.5%             | <b>5.6%</b>              | 2.6%               | <b>2.6%</b>              | <b>0.002</b>     | 0.962        |
| - Minors who come to consultation on their own                                        | 3.0%             | 2.7%                     | 3.4%               | 2.8%                     | 0.928            | 0.270        |
| <b>Theme 3: Specific care needs</b>                                                   |                  |                          |                    |                          |                  |              |
| - <b>Senior citizens living on their own without caregivers</b>                       | 13.2%            | <b>16.0%</b>             | 12.7%              | <b>11.2%</b>             | <b>0.034</b>     | 0.401        |
| - <b>Patients with other social problems</b>                                          | 9.2%             | <b>12.5%</b>             | 7.4%               | <b>8.1%</b>              | <b>0.021</b>     | 0.579        |
| - Patients regularly needing home visits                                              | 8.7%             | 8.4%                     | 8.3%               | 9.5%                     | 0.370            | 0.277        |
| - Patients living in a nursing home                                                   | 8.1%             | 7.8%                     | 7.9%               | 8.6%                     | 0.553            | 0.642        |
| - Patients who are caregivers                                                         | 4.8%             | 5.2%                     | 4.2%               | 5.0%                     | 0.739            | 0.356        |
| - Struggling single parents                                                           | 4.3%             | 4.9%                     | 3.9%               | 4.2%                     | 0.469            | 0.719        |
| <b>Theme 4: Patient behaviour</b>                                                     |                  |                          |                    |                          |                  |              |
| - Regular patients of the practice                                                    | 85.2%            | 83.3%                    | 86.0%              | 86.1%                    | 0.245            | 0.969        |
| - Patients, who come with self-diagnoses via media                                    | 13.2%            | 14.1%                    | 13.6%              | 11.8%                    | 0.308            | 0.408        |
| - Patients with poor therapy adherence                                                | 11.3%            | 9.2%                     | 12.7%              | 11.9%                    | 0.135            | 0.722        |
| - Demanding patients                                                                  | 11.1%            | 11.0%                    | 11.0%              | 11.2%                    | 0.926            | 0.920        |
| - Patients who regularly make excessive demands on GP's time                          | 7.6%             | 9.5%                     | 7.6%               | 6.0%                     | 0.086            | 0.301        |
| - <b>Patients who proactively consult additional specialists for the same problem</b> | 6.7%             | <b>7.5%</b>              | <b>7.8%</b>        | <b>4.7%</b>              | <b>0.008</b>     | <b>0.016</b> |
| - Frequent attenders                                                                  | 6.0%             | 5.7%                     | 5.4%               | 6.8%                     | 0.537            | 0.434        |
| - Patients who proactively consult different GPs because of the same problem          | 2.7%             | 2.8%                     | 3.0%               | 2.3%                     | 0.435            | 0.375        |

1  
2  
3  
4  
5  
6  
7  
8  
9  
10  
11  
12  
13  
14  
15  
16  
17  
18  
19  
20  
21  
22  
23  
24  
25  
26  
27  
28  
29  
30  
31  
32  
33  
34  
35  
36  
37  
38  
39  
40  
41  
42  
43  
44  
45  
46

U/R: comparison „urban areas“ vs. „rural areas“; E/R: comparison „environs“ vs. „rural areas“; <sup>MA</sup>: Multiple answers permitted; Statistically significant results ( $p \leq 0.05$ ) are shown in bold and italic

For peer review only

**Table 5: Association between the frequencies of the consultations of categories of patient types in GP practices and urban areas vs. rural areas: results of a logistic regression**

| <b>urban areas vs. rural areas</b>                                           | <b>OR</b> | <b>95% CI</b> | <b>p</b> |
|------------------------------------------------------------------------------|-----------|---------------|----------|
| Minors accompanied by their parents                                          | 0.71      | 0.61 to 0.83  | <0.001   |
| Privately insured patients                                                   | 1.17      | 1.05 to 1.31  | 0.005    |
| Patients with poor therapy adherence                                         | 0.87      | 0.80 to 0.95  | 0.002    |
| Senior citizens living on their own without caregivers                       | 1.05      | 1.01 to 1.09  | 0.014    |
| Educationally disadvantaged patients with low health literacy                | 1.11      | 1.04 to 1.19  | 0.001    |
| Patients with psychiatric disorders                                          | 1.07      | 1.02 to 1.12  | 0.011    |
| Patients with dementia                                                       | 0.90      | 0.82 to 0.99  | 0.036    |
| Patients with migration background and culturally different disease concepts | 1.23      | 1.06 to 1.42  | 0.007    |

**Table 6: Association between the frequencies of the consultations of categories of patients types in GP practices and environs vs. rural areas: results of a logistic regression**

| <b>environs vs. rural areas</b>                                              | <b>OR</b> | <b>95% CI</b> | <b>p</b> |
|------------------------------------------------------------------------------|-----------|---------------|----------|
| Patients who are caregivers                                                  | 0.91      | 0.83 to 0.99  | 0.022    |
| Privately insured patients                                                   | 1.10      | 1.03 to 1.18  | 0.005    |
| Patients who proactively consult additional specialists for the same problem | 1.06      | 1.01 to 1.12  | 0.024    |

## Additional file 1: Questionnaire on patient types

**HA24 How many patients do you see in an average week during your consultation including home visits (no overcrowded weeks, no below average weeks, no flu season)?**

patients

**HA25 How many patients you see in an average week ... (estimated in absolute numbers, the sum need not be the sum of HA24)**

belong to your regular patient base (no representation / emergency patients)

are privately insured patients

have a chronic illness

have multimorbidity (at least two chronic diseases)

have a substance abuse disorder

have a psychiatric disorder (e.g. depression, burnout, anxiety, borderline disorder)

have dementia

have a somatoform disorders (e.g. unclear pain, irritable bowel)

have a culturally different disease concept due to migration background

have communication problems due to migration background

have social problems due to poverty/low income

are patients with other social problems (e.g. marital problems, loneliness, workplace bullying)

are educationally disadvantaged patients with low health literacy

come with self-diagnoses via media (e.g. internet, magazines, television)

are struggling single parents

are children (under the age of 18) accompanied by their parents

are children (under the age of 18) who come to consultation on their own

are senior citizens living in their own without caregivers

are patients who are caregivers

1  
2  
3  
4 L J L J L J are patients who need regular home visits

5  
6 L J L J L J are patients living in nursing home

7  
8 L J L J L J are demanding patients (e.g. patients requesting prolonged sick certificates,  
9 inappropriate medication or physiotherapy)

10  
11 L J L J L J are patients with poor therapy adherence (eg, regarding medication, lifestyle changes)

12  
13 L J L J L J are patients who come to the general practitioner at least one consultation per week

14  
15 L J L J L J are patients who regularly make excessive demands on GP's time

16  
17 L J L J L J are patients who proactively consult different GPs because of the same problem

18  
19 L J L J L J are patients who proactively consult additional specialists for the same problem  
20  
21  
22  
23  
24  
25  
26  
27  
28  
29  
30  
31  
32  
33  
34  
35  
36  
37  
38  
39  
40  
41  
42  
43  
44  
45  
46  
47  
48  
49  
50  
51  
52  
53  
54  
55  
56  
57  
58  
59  
60

Dr. Heike Hansen, Dr. Ingmar Schäfer, Dr. Nadine Janis Pohontsch, Agata Kazek, Hanna Hardt, Dr. Dagmar Lühmann, Prof. Dr. Martin Scherer

## Regional differences in the patient population of general practices in northern Germany - results of a mixed methods study

### STROBE 2007 (v4) checklist of items to be included in reports of observational studies in epidemiology\* Checklist for cohort, case-control, and cross-sectional studies (combined)

| Section/Topic             | Item # | Recommendation                                                                                                                                                                                                                                                                                                                                                                                                                                                         | Reported on page # |
|---------------------------|--------|------------------------------------------------------------------------------------------------------------------------------------------------------------------------------------------------------------------------------------------------------------------------------------------------------------------------------------------------------------------------------------------------------------------------------------------------------------------------|--------------------|
| Title and abstract        | 1      | (a) Indicate the study's design with a commonly used term in the title or the abstract                                                                                                                                                                                                                                                                                                                                                                                 | 1                  |
|                           |        | (b) Provide in the abstract an informative and balanced summary of what was done and what was found                                                                                                                                                                                                                                                                                                                                                                    | 2                  |
| <b>Introduction</b>       |        |                                                                                                                                                                                                                                                                                                                                                                                                                                                                        |                    |
| Background/rationale      | 2      | Explain the scientific background and rationale for the investigation being reported                                                                                                                                                                                                                                                                                                                                                                                   | 4                  |
| Objectives                | 3      | State specific objectives, including any pre-specified hypotheses                                                                                                                                                                                                                                                                                                                                                                                                      | 4-5                |
| <b>Methods</b>            |        |                                                                                                                                                                                                                                                                                                                                                                                                                                                                        |                    |
| Study design              | 4      | Present key elements of study design early in the paper                                                                                                                                                                                                                                                                                                                                                                                                                | 5                  |
| Setting                   | 5      | Describe the setting, locations, and relevant dates, including periods of recruitment, exposure, follow-up, and data collection                                                                                                                                                                                                                                                                                                                                        | 5-6                |
| Participants              | 6      | (a) <i>Cohort study</i> —Give the eligibility criteria, and the sources and methods of selection of participants. Describe methods of follow-up<br><i>Case-control study</i> —Give the eligibility criteria, and the sources and methods of case ascertainment and control selection. Give the rationale for the choice of cases and controls<br><i>Cross-sectional study</i> —Give the eligibility criteria, and the sources and methods of selection of participants | 6                  |
|                           |        | (b) <i>Cohort study</i> —For matched studies, give matching criteria and number of exposed and unexposed<br><i>Case-control study</i> —For matched studies, give matching criteria and the number of controls per case                                                                                                                                                                                                                                                 |                    |
| Variables                 | 7      | Clearly define all outcomes, exposures, predictors, potential confounders, and effect modifiers. Give diagnostic criteria, if applicable                                                                                                                                                                                                                                                                                                                               | 6-7                |
| Data sources/ measurement | 8*     | For each variable of interest, give sources of data and details of methods of assessment (measurement). Describe comparability of assessment methods if there is more than one group                                                                                                                                                                                                                                                                                   | 6-7                |
| Bias                      | 9      | Describe any efforts to address potential sources of bias                                                                                                                                                                                                                                                                                                                                                                                                              | 6-7                |
| Study size                | 10     | Explain how the study size was arrived at                                                                                                                                                                                                                                                                                                                                                                                                                              | 6                  |
| Quantitative variables    | 11     | Explain how quantitative variables were handled in the analyses. If applicable, describe which groupings were chosen and why                                                                                                                                                                                                                                                                                                                                           | 6-7                |

|                          |     |                                                                                                                                                                                                                                                                                                           |                        |
|--------------------------|-----|-----------------------------------------------------------------------------------------------------------------------------------------------------------------------------------------------------------------------------------------------------------------------------------------------------------|------------------------|
| Statistical methods      | 12  | (a) Describe all statistical methods, including those used to control for confounding                                                                                                                                                                                                                     | 6-7                    |
|                          |     | (b) Describe any methods used to examine subgroups and interactions                                                                                                                                                                                                                                       | 6-7                    |
|                          |     | (c) Explain how missing data were addressed                                                                                                                                                                                                                                                               | N/A                    |
|                          |     | (d) <i>Cohort study</i> —If applicable, explain how loss to follow-up was addressed<br><i>Case-control study</i> —If applicable, explain how matching of cases and controls was addressed<br><i>Cross-sectional study</i> —If applicable, describe analytical methods taking account of sampling strategy | 6                      |
|                          |     | (e) Describe any sensitivity analyses                                                                                                                                                                                                                                                                     | N/A                    |
| <b>Results</b>           |     |                                                                                                                                                                                                                                                                                                           |                        |
| Participants             | 13* | (a) Report numbers of individuals at each stage of study—eg numbers potentially eligible, examined for eligibility, confirmed eligible, included in the study, completing follow-up, and analysed                                                                                                         | 8                      |
|                          |     | (b) Give reasons for non-participation at each stage                                                                                                                                                                                                                                                      | 8                      |
|                          |     | (c) Consider use of a flow diagram                                                                                                                                                                                                                                                                        | s. Schäfer et al. 2020 |
| Descriptive data         | 14* | (a) Give characteristics of study participants (eg demographic, clinical, social) and information on exposures and potential confounders                                                                                                                                                                  | 8; table 1 and 2       |
|                          |     | (b) Indicate number of participants with missing data for each variable of interest                                                                                                                                                                                                                       | 8; table 1 and 2       |
|                          |     | (c) <i>Cohort study</i> —Summarise follow-up time (eg, average and total amount)                                                                                                                                                                                                                          |                        |
| Outcome data             | 15* | <i>Cohort study</i> —Report numbers of outcome events or summary measures over time                                                                                                                                                                                                                       |                        |
|                          |     | <i>Case-control study</i> —Report numbers in each exposure category, or summary measures of exposure                                                                                                                                                                                                      |                        |
|                          |     | <i>Cross-sectional study</i> —Report numbers of outcome events or summary measures                                                                                                                                                                                                                        | 12-13, table 4 and 5   |
| Main results             | 16  | (a) Give unadjusted estimates and, if applicable, confounder-adjusted estimates and their precision (eg, 95% confidence interval). Make clear which confounders were adjusted for and why they were included                                                                                              | 12-13                  |
|                          |     | (b) Report category boundaries when continuous variables were categorized                                                                                                                                                                                                                                 | N/A                    |
|                          |     | (c) If relevant, consider translating estimates of relative risk into absolute risk for a meaningful time period                                                                                                                                                                                          | N/A                    |
| Other analyses           | 17  | Report other analyses done—eg analyses of subgroups and interactions, and sensitivity analyses                                                                                                                                                                                                            | N/A                    |
| <b>Discussion</b>        |     |                                                                                                                                                                                                                                                                                                           |                        |
| Key results              | 18  | Summarise key results with reference to study objectives                                                                                                                                                                                                                                                  | 14                     |
| Limitations              | 19  | Discuss limitations of the study, taking into account sources of potential bias or imprecision. Discuss both direction and magnitude of any potential bias                                                                                                                                                | 14                     |
| Interpretation           | 20  | Give a cautious overall interpretation of results considering objectives, limitations, multiplicity of analyses, results from similar studies, and other relevant evidence                                                                                                                                | 14-15                  |
| Generalisability         | 21  | Discuss the generalisability (external validity) of the study results                                                                                                                                                                                                                                     | 15-16                  |
| <b>Other information</b> |     |                                                                                                                                                                                                                                                                                                           |                        |



1  
2  
3  
4  
5  
6  
7  
8  
9  
10  
11  
12  
13  
14  
15  
16  
17  
18  
19  
20  
21  
22  
23  
24  
25  
26  
27  
28  
29  
30  
31  
32  
33  
34  
35  
36  
37  
38  
39  
40  
41  
42  
43  
44  
45  
46

|         |    |                                                                                                                                                               |    |
|---------|----|---------------------------------------------------------------------------------------------------------------------------------------------------------------|----|
| Funding | 22 | Give the source of funding and the role of the funders for the present study and, if applicable, for the original study on which the present article is based | 17 |
|---------|----|---------------------------------------------------------------------------------------------------------------------------------------------------------------|----|

\*Give information separately for cases and controls in case-control studies and, if applicable, for exposed and unexposed groups in cohort and cross-sectional studies.

**Note:** An Explanation and Elaboration article discusses each checklist item and gives methodological background and published examples of transparent reporting. The STROBE checklist is best used in conjunction with this article (freely available on the Web sites of PLoS Medicine at <http://www.plosmedicine.org/>, Annals of Internal Medicine at <http://www.annals.org/>, and Epidemiology at <http://www.epidem.com/>). Information on the STROBE Initiative is available at [www.strobe-statement.org](http://www.strobe-statement.org).

For peer review only

## Consolidated criteria for reporting qualitative studies (COREQ): 32-item checklist

| No                                                     | Item                                        | Guide questions/description                                                                                     | Reported on page/<br>comment             |
|--------------------------------------------------------|---------------------------------------------|-----------------------------------------------------------------------------------------------------------------|------------------------------------------|
| <b>Domain 1:<br/>Research team<br/>and reflexivity</b> |                                             |                                                                                                                 |                                          |
| Personal<br>Characteristics                            |                                             |                                                                                                                 |                                          |
| 1.                                                     | Interviewer/facilitator                     | Which author/s conducted the interview or focus group?                                                          | page 6                                   |
| 2.                                                     | Credentials                                 | What were the researcher's credentials? <i>E.g. PhD, MD</i>                                                     | page 17                                  |
| 3.                                                     | Occupation                                  | What was their occupation at the time of the study?                                                             | page 17                                  |
| 4.                                                     | Gender                                      | Was the researcher male or female?                                                                              | both sexes were<br>involved              |
| 5.                                                     | Experience and training                     | What experience or training did the researcher have?                                                            | page 17                                  |
| Relationship with<br>participants                      |                                             |                                                                                                                 |                                          |
| 6.                                                     | Relationship established                    | Was a relationship established prior to study commencement?                                                     | no                                       |
| 7.                                                     | Participant knowledge of<br>the interviewer | What did the participants know about the researcher? <i>e.g. personal goals, reasons for doing the research</i> | name, institute,<br>topic of discussion: |

| No                            | Item                                     | Guide questions/description                                                                                                                                        | Reported on page/<br>comment               |
|-------------------------------|------------------------------------------|--------------------------------------------------------------------------------------------------------------------------------------------------------------------|--------------------------------------------|
|                               |                                          |                                                                                                                                                                    | regional<br>differences in<br>primary care |
| 8.                            | Interviewer characteristics              | What characteristics were reported about the interviewer/facilitator?<br>e.g. <i>Bias, assumptions, reasons and interests in the research topic</i>                | age, profession                            |
| <b>Domain 2: study design</b> |                                          |                                                                                                                                                                    |                                            |
|                               | Theoretical<br>framework                 |                                                                                                                                                                    |                                            |
| 9.                            | Methodological orientation<br>and Theory | What methodological orientation was stated to underpin the study? e.g.<br><i>grounded theory, discourse analysis, ethnography, phenomenology, content analysis</i> | page 7                                     |
|                               | Participant<br>selection                 |                                                                                                                                                                    |                                            |
| 10.                           | Sampling                                 | How were participants selected? e.g. <i>purposive, convenience, consecutive, snowball</i>                                                                          | page 6                                     |
| 11.                           | Method of approach                       | How were participants approached? e.g. <i>face-to-face, telephone, mail, email</i>                                                                                 | page 6                                     |

| No              | Item                         | Guide questions/description                                                              | Reported on page/<br>comment                                                                              |
|-----------------|------------------------------|------------------------------------------------------------------------------------------|-----------------------------------------------------------------------------------------------------------|
| 12.             | Sample size                  | How many participants were in the study?                                                 | page 8                                                                                                    |
| 13.             | Non-participation            | How many people refused to participate or dropped out? Reasons?                          | Page 6; 1910 GPs were invited. 65 GPs were included in the focus groups. Details s. Pohontsch et al. 2018 |
| Setting         |                              |                                                                                          |                                                                                                           |
| 14.             | Setting of data collection   | Where was the data collected? e.g. <i>home, clinic, workplace</i>                        | page 6                                                                                                    |
| 15.             | Presence of non-participants | Was anyone else present besides the participants and researchers?                        | page 7                                                                                                    |
| 16.             | Description of sample        | What are the important characteristics of the sample? e.g. <i>demographic data, date</i> | page 8, table 1                                                                                           |
| Data collection |                              |                                                                                          |                                                                                                           |
| 17.             | Interview guide              | Were questions, prompts, guides provided by the authors? Was it pilot tested?            | pages 6-7                                                                                                 |
| 18.             | Repeat interviews            | Were repeat interviews carried out? If yes, how many?                                    | page 8, 9 focus groups                                                                                    |

| No                                      | Item                           | Guide questions/description                                              | Reported on page/<br>comment |
|-----------------------------------------|--------------------------------|--------------------------------------------------------------------------|------------------------------|
| 19.                                     | Audio/visual recording         | Did the research use audio or visual recording to collect the data?      | page 6                       |
| 20.                                     | Field notes                    | Were field notes made during and/or after the interview or focus group?  | page 7                       |
| 21.                                     | Duration                       | What was the duration of the interviews or focus group?                  | page 6, 120 minutes          |
| 22.                                     | Data saturation                | Was data saturation discussed?                                           | no                           |
| 23.                                     | Transcripts returned           | Were transcripts returned to participants for comment and/or correction? | no                           |
| <b>Domain 3: analysis and findingsz</b> |                                |                                                                          |                              |
| Data analysis                           |                                |                                                                          |                              |
| 24.                                     | Number of data coders          | How many data coders coded the data?                                     | page 7, 3 data coders        |
| 25.                                     | Description of the coding tree | Did authors provide a description of the coding tree?                    | page 23, table 3             |
| 26.                                     | Derivation of themes           | Were themes identified in advance or derived from the data?              | page 7                       |
| 27.                                     | Software                       | What software, if applicable, was used to manage the data?               | page 7, Maxqda               |
| 28.                                     | Participant checking           | Did participants provide feedback on the findings?                       | no                           |

| No        | Item                            | Guide questions/description                                                                                                                 | Reported on page/<br>comment |
|-----------|---------------------------------|---------------------------------------------------------------------------------------------------------------------------------------------|------------------------------|
| Reporting |                                 |                                                                                                                                             |                              |
| 29.       | Quotations presented            | Were participant quotations presented to illustrate the themes / findings?<br>Was each quotation identified? e.g. <i>participant number</i> | pages 8-12                   |
| 30.       | Data and findings<br>consistent | Was there consistency between the data presented and the findings?                                                                          | yes                          |
| 31.       | Clarity of major themes         | Were major themes clearly presented in the findings?                                                                                        | page 8, 4 categories         |
| 32.       | Clarity of minor themes         | Is there a description of diverse cases or discussion of minor themes?                                                                      | pages 8-12                   |

# BMJ Open

## Regional differences in the patient population of general practices in northern Germany - results of a mixed methods study

|                                 |                                                                                                                                                                                                                                                                                                                                                                                                                                                                                                                                                                                                                                                                                                                    |
|---------------------------------|--------------------------------------------------------------------------------------------------------------------------------------------------------------------------------------------------------------------------------------------------------------------------------------------------------------------------------------------------------------------------------------------------------------------------------------------------------------------------------------------------------------------------------------------------------------------------------------------------------------------------------------------------------------------------------------------------------------------|
| Journal:                        | <i>BMJ Open</i>                                                                                                                                                                                                                                                                                                                                                                                                                                                                                                                                                                                                                                                                                                    |
| Manuscript ID                   | bmjopen-2020-041762.R1                                                                                                                                                                                                                                                                                                                                                                                                                                                                                                                                                                                                                                                                                             |
| Article Type:                   | Original research                                                                                                                                                                                                                                                                                                                                                                                                                                                                                                                                                                                                                                                                                                  |
| Date Submitted by the Author:   | 07-Oct-2020                                                                                                                                                                                                                                                                                                                                                                                                                                                                                                                                                                                                                                                                                                        |
| Complete List of Authors:       | Hansen, Heike; University Medical Center Hamburg-Eppendorf, Department of Primary Medical Care<br>Schäfer, Ingmar; University Medical Center Hamburg-Eppendorf, Department of Primary Medical Care<br>Pohontsch, Nadine; University Medical Center Hamburg-Eppendorf, Department of Primary Medical Care<br>Kazek, Agata; University Medical Center Hamburg-Eppendorf, Department of Primary Medical Care<br>Hardt, Hanna; University Medical Center Hamburg-Eppendorf, Department of Primary Medical Care<br>Lühmann, Dagmar; University Medical Center Hamburg-Eppendorf, Department of Primary Medical Care<br>Scherer, Martin; University Medical Center Hamburg-Eppendorf, Department of Primary Medical Care |
| <b>Primary Subject Heading</b>: | General practice / Family practice                                                                                                                                                                                                                                                                                                                                                                                                                                                                                                                                                                                                                                                                                 |
| Secondary Subject Heading:      | Qualitative research, Epidemiology, General practice / Family practice                                                                                                                                                                                                                                                                                                                                                                                                                                                                                                                                                                                                                                             |
| Keywords:                       | PRIMARY CARE, QUALITATIVE RESEARCH, EPIDEMIOLOGY                                                                                                                                                                                                                                                                                                                                                                                                                                                                                                                                                                                                                                                                   |
|                                 |                                                                                                                                                                                                                                                                                                                                                                                                                                                                                                                                                                                                                                                                                                                    |

SCHOLARONE™  
Manuscripts

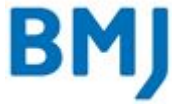

I, the Submitting Author has the right to grant and does grant on behalf of all authors of the Work (as defined in the below author licence), an exclusive licence and/or a non-exclusive licence for contributions from authors who are: i) UK Crown employees; ii) where BMJ has agreed a CC-BY licence shall apply, and/or iii) in accordance with the terms applicable for US Federal Government officers or employees acting as part of their official duties; on a worldwide, perpetual, irrevocable, royalty-free basis to BMJ Publishing Group Ltd ("BMJ") its licensees and where the relevant Journal is co-owned by BMJ to the co-owners of the Journal, to publish the Work in this journal and any other BMJ products and to exploit all rights, as set out in our [licence](#).

The Submitting Author accepts and understands that any supply made under these terms is made by BMJ to the Submitting Author unless you are acting as an employee on behalf of your employer or a postgraduate student of an affiliated institution which is paying any applicable article publishing charge ("APC") for Open Access articles. Where the Submitting Author wishes to make the Work available on an Open Access basis (and intends to pay the relevant APC), the terms of reuse of such Open Access shall be governed by a Creative Commons licence – details of these licences and which [Creative Commons](#) licence will apply to this Work are set out in our licence referred to above.

Other than as permitted in any relevant BMJ Author's Self Archiving Policies, I confirm this Work has not been accepted for publication elsewhere, is not being considered for publication elsewhere and does not duplicate material already published. I confirm all authors consent to publication of this Work and authorise the granting of this licence.



1  
2  
3 Heike Hansen<sup>1\*</sup>, Ingmar Schäfer<sup>1</sup>, Nadine Janis Pohontsch<sup>1</sup>, Agata Kazek<sup>1</sup>, Hanna Hardt<sup>1</sup>, Dagmar  
4 Lühmann<sup>1</sup>, Martin Scherer<sup>1</sup>  
5  
6  
7  
8

9  
10 **Regional differences in the patient population of general practices in northern**  
11 **Germany - results of a mixed methods study**  
12  
13  
14  
15

16 <sup>1</sup> Department of Primary Medical Care, University Medical Center Hamburg-Eppendorf, Hamburg,  
17 Germany  
18  
19

20  
21 \* Corresponding author:  
22

23 Dr. Heike Hansen  
24

25 Department of Primary Medical Care  
26

27 University Medical Center Hamburg-Eppendorf  
28

29 Martinistr. 52  
30

31 20246 Hamburg  
32

33 Germany  
34

35 Phone: ++49-40/7410-57179  
36

37 Fax: ++49-40/7410-53681  
38

39 h.hansen@uke.de  
40  
41

42 **Word count: 6,148**  
43  
44  
45  
46  
47  
48  
49  
50  
51  
52  
53  
54  
55  
56  
57  
58  
59  
60

## Abstract

**Objectives:** The aim of our study was to explore patient types in general practitioner (GP) practices and to quantify the regional differences of the frequencies of these patient types in northern Germany.

**Design and setting:** We conducted a mixed methods study based on focus groups and standardised interviews with GPs. All counties and independent cities within a radius of 120 km around Hamburg were assigned one of three regional categories (urban areas, environs, rural areas). The focus groups were analysed using qualitative content analysis. Relative frequencies of consultations by patient types and differences between the regions were calculated. Logistic regression analyses were used to identify differences among regions.

**Participants:** Nine focus groups with 65 GPs (67.7% male). From the 280 initially recruited GPs 211 (65.4% male) could be personally interviewed.

**Results:** Four themes with 27 patient types were derived from the focus groups: patients classified by morbidity, sociodemographic characteristics, special care needs and patient behaviour. Five patient characteristics were significantly more prevalent in urban areas than rural areas: patients with migration background and culturally different disease concepts (OR=1.23; 95% CI 1.06-1.42), privately insured patients (OR=1.17; 95% CI 1.05-1.31), educationally disadvantaged patients with low health literacy (OR=1.11; 95% CI 1.04-1.19), patients with psychiatric disorders (OR=1.07; 95% CI 1.02-1.12) and senior citizens living on their own without caregivers (OR=1.05; 95% CI 1.05-1.31). Three patient types were significantly less prevalent in urban areas: minors accompanied by their parents (OR=0.71; 95% CI 0.61-0.83), patients with poor therapy adherence (OR=0.87, 95% CI 0.80-0.95) and patients with dementia (OR=0.90; 95% CI 0.82-0.99).

**Conclusions:** GPs could compensate the specific needs of their patients with medical training aligned with the requirements of their region. Urban GPs need skills treating patients with psychiatric, social and cultural problems, rural GPs regarding the care for children or noncompliant patients.

### Trial registration:

The study was registered in ClinicalTrials.gov (NCT02558322; <https://clinicaltrials.gov/ct2/show/NCT02558322>).

**Strengths and limitations of this study:**

- GPs who participated in the focus groups may differ from non-participants due to their motivation, practice experience and special problems from their regions, eg. undersupply of physicians.
- For the qualitative part of the study, in order to maximize the heterogeneity of focus group participants' experience we ensured that both male and female GPs were included, with longer and shorter durations of practice experience, lower and higher age, from smaller and larger practices and different types of practices from all three areas.
- For the quantitative part of the study GP practices were included via a quota sampling.
- The contributions of the GPs in the focus groups and the answers in the interviews might have been influenced by memory gaps, errors or social desirability.
- The GPs were recruited from the regions of northern Germany exclusively. Therefore the sample may possibly not represent the rest of Germany.

## Background

The number of general practices per population and the supply of certain services vary greatly between urban and rural areas. Urban areas have a better availability of GPs, while rural areas in Germany struggle with the impending shortage of medical personnel and services [1, 2]. As a result, general practitioners (GPs) from rural areas see more patients, have a higher total amount of working hours, a higher workload of home visits and they provide a broader spectrum of services [3–7]. Previously published results from our qualitative analyses indicate that GPs from urban and rural areas perceive their professional role differently. Urban GPs assessed themselves just as a provider of medical services whereas rural GPs described themselves as a medical companion with an intensive doctor-patient-relationship [8].

Doctor-patient-relationship and disease management in primary care are influenced by patient characteristics. According to Fenton et al., higher rates of requests for tests, prescriptions and referrals in family medicine practices were significantly associated with age, greater bother or worry about symptoms, a more extroverted patient personality, greater life satisfaction and a higher probability of at least one prior encounter with the physician that had been visited [9]. Ferroni et al. demonstrated that the management of non-insulin-treated type II diabetes was insufficient in younger patients, immigrants and patients not attending diabetes clinics [10].

Van den Bussche et al. analyzed the overutilization of ambulatory medical care in the elderly German population. They identified two main patient types with regard to overutilization of medical services: One type comprised patients belonging to the oldest age group (42 %  $\geq$  75 years), having many practice contacts (1.4 contacts/week), suffering from severe somatic diseases and multimorbidity and needing long-term care. The other type comprised younger elderly (30 %  $\geq$  75 years) suffering from psychiatric or psychosomatic complaints, being less frequently multimorbid and/or nursing care dependent and contacting a large number of different practices [11]. Another study examined self-care coping strategies in people with diabetes. They found three patient types: proactive managers who independently monitor and adjust blood glucose and the self-care regime, passive followers who adhere to the prescribed self-care regime without self-adjustment and nonconformists who do not follow most of the prescribed self-care regime [12].

Some studies took regional differences of the distribution of patient characteristics or patient types into consideration. Mukhtar et al. analyzed factors associated with consultation rates in general practice in England. Consultation rates increased for females, deprived and older patients and varied by ethnicity. They did not find associations between consultation rates and the location of general practices in rural areas [13]. A study by Carr-Hill et al., which was conducted over 25 years ago,

1  
2  
3 identified higher rates of consultations in association with morbidity-specific and sociodemographic  
4 determinants such as chronic illness, unemployment, living in partnership and living in urban areas  
5 [14].  
6  
7

8  
9 To the best of our knowledge, there are no studies exploring patient types in primary care and  
10 considering their regional differences in Germany. Our definition of patient types is the combination  
11 of typical characteristics into patterns of characteristic properties, which e.g. describes the behaviour,  
12 needs or morbidity of a group of patients. Therefore, the aim of our study was to explore 1) patient  
13 types in GP practices and 2) to quantify the regional differences of the frequencies of these patient  
14 types in GP practices and 2) to quantify the regional differences of the frequencies of these patient  
15 types in GP practices and 2) to quantify the regional differences of the frequencies of these patient  
16 types in GP practices and 2) to quantify the regional differences of the frequencies of these patient  
17 types in northern Germany.  
18  
19

## 20 21 **Methods**

### 22 **Study design**

23  
24 The investigation presented here is part of the study “Regional variations in primary medical care of  
25 northern Germany - Outpatient Healthcare Research North (*Ambulante Versorgungsforschung Nord -*  
26 *AVFN*)”. This study follows a sequential exploratory design [15] consisting of a qualitative and a  
27 quantitative part. The qualitative part includes an exploratory qualitative focus groups study with GPs  
28 and patients. The quantitative part builds on the qualitative results and comprises a cross-sectional  
29 observational study to quantify regional differences in primary health care in northern Germany. The  
30 methods of the quantitative part of the study had been entered in the study register ClinicalTrials.gov  
31 (NCT02558322) before starting the survey and described in the published study protocol [16]. This  
32 paper presents the results of the GP focus groups from the qualitative part and of the GP interviews  
33 from the quantitative part concerning the description of patient types. The study was approved by the  
34 Ethics Commission of the Hamburg Medical Association on 12 August 2013 (file number PV 4535).  
35  
36  
37  
38  
39  
40  
41  
42  
43  
44  
45  
46

### 47 **Study regions and regional categories**

48  
49 The study regions and regional categories have been described in previous publications [3, 8, 17]. In  
50 brief, three categories were defined for the regional comparison based on the so-called “structural  
51 settlement of district types” of the German Federal Institute for Research on Building, Urban Affairs  
52 and Spatial Development [18]. The category “urban areas” included independent large cities  
53 constituting districts in their own right (over 100,000 inhabitants), the category “environs” urbanised  
54 districts (with a density of over 300 inhabitants/km<sup>2</sup>) and rural districts with signs of urban  
55 agglomeration (with a density of over 150 inhabitants/km<sup>2</sup>) and the category “rural areas” sparsely  
56  
57  
58  
59  
60

1  
2  
3 populated rural districts (with a density of less than 150 inhabitants/km<sup>2</sup>).  
4

5 The areas of the cross-sectional observational study have been described in the study protocol [16].  
6 All administrative districts (counties and independent cities) were included in the study where at least  
7 20% of the land area was located within a radius of 120 km (ca. 75 miles) linear distance around the  
8 study centre (University Medical Center Hamburg-Eppendorf). The chosen administrative districts for  
9 the study were derived from the German Federal States of Bremen, Hamburg, Mecklenburg-Western  
10 Pomerania, Lower Saxony, Saxony-Anhalt and Schleswig-Holstein. The specific districts and cities are  
11 shown in detail in previous publications [3, 16].  
12  
13  
14  
15  
16  
17  
18  
19

## 20 **Recruitment**

21 GPs were eligible for the study if they had been accredited as statutory health insurance physicians in  
22 the respective administrative districts. Therefore we used the database of the Department of Primary  
23 Medical Care at the University Medical Center Hamburg-Eppendorf as well as the databases of the  
24 respective regional associations of statutory health insurance physicians.  
25  
26  
27  
28

29 For the qualitative focus group study, we contacted GPs from 17 districts and cities (n=1910). The GPs  
30 were invited by mail to participate in the focus groups. GPs from six cities with populations over 20,000  
31 in the regional category rural areas were excluded in order to avoid a bias by GPs practicing in larger  
32 cities within the rural areas focus groups. Detailed information on the participating districts and cities  
33 of the focus groups can be found elsewhere [8].  
34  
35  
36  
37

38 For the cross-sectional observational study, the GPs were selected by a quota sampling design in order  
39 to represent all regionally different healthcare situations in the study. The purpose of this design was  
40 to raise the probability of also including underserved regions into the study where usually many GPs  
41 were unwilling or unable to participate in a study due to their heavy workload. The goal of the study  
42 was to recruit at least 80 GPs per regional category. The sample was stratified into individual  
43 administrative districts and the sample size in each district was fixed proportionally to the respective  
44 population size. GPs were invited to participate in the study by letter.  
45  
46  
47  
48  
49  
50  
51

## 52 **Data collection**

53 The focus groups took place between May and November 2014 in six different locations to allow  
54 participants from different regions to reach the meeting easily. The focus groups were led by at least  
55 two experienced moderators out of four (HH, IS, NJP and AS). A semi-structured interview guideline  
56 was used and the focus groups lasted approx. 120 minutes. The guideline referred to the main  
57  
58  
59  
60

1  
2  
3 categories: most common reasons for consultations, patient characteristics, regional differences  
4 concerning work of GPs and expectations, needs and treatment requirements. The interview guideline  
5 is published elsewhere [17]. The introductory question regarding the patient types was: "Which kind  
6 of patients consult you most often?". The focus groups were digitally audio recorded, logged and  
7 transcribed verbatim following designated transcription rules by trained research assistants. Field  
8 notes were made during the focus groups by the moderators. HH checked all transcripts for accuracy.  
9 In order to protect participants` identities all names were replaced by numbers and details that would  
10 have enabled the identification of individuals were deleted.

11  
12  
13 Recruitment of the cross-sectional observational study started in May 2015 and data were collected  
14 between July 2015 and April 2017. The GPs were visited by staff members of the project and  
15 interviewed personally. Participants answered by memory recall and were allowed to check their  
16 patient documentation if necessary. The standardised interviews obtained information regarding the  
17 GPs personal and professional characteristics (age, gender, workload, post-graduate and advanced  
18 medical training, place of residence, data on the practice) and the number of weekly contacts with 27  
19 patient types derived from the focus groups. The interviews included information from home visits  
20 and referred to average practice weeks (no overcrowded weeks, no below average weeks, no flu  
21 season). The questionnaire is presented in the additional file 1. Furthermore we explored the  
22 frequency of 99 different reasons for consultation from 17 areas/ organ systems and 38 different  
23 procedures of healthcare services. These analyses are published elsewhere [3].  
24  
25  
26  
27  
28  
29  
30  
31  
32  
33  
34  
35  
36  
37  
38  
39

### 40 **Data analysis**

41 The transcripts of the focus groups were analysed using qualitative content analysis [19] following a  
42 realistic paradigm [20]. We derived inductive categories from the material. HH, NJP and IS analysed  
43 the transcripts, discussed and consented all categories, category descriptions and examples. Data  
44 were managed using MAXQDA 11 (Verbi GmbH). We used a parsimonious interpretive approach to  
45 language translation of the presented statements of the GPs and stayed as close as possible to a literal  
46 translation of the quotations.  
47  
48  
49

50 The quantitative data were prepared and analysed using Stata 15.1. Relative frequencies of  
51 consultations from patient types and differences between the regions urban areas, environs and rural  
52 areas were described and regional differences were analysed using the t-test. The results are  
53 presented as the proportion of the respective categories of patient types of all patients consulting the  
54 respective practice. As it might be that patient types are correlated, ie, patients systematically belong  
55 to more than one type, we also analysed in which patient types the biggest regional difference can be  
56  
57  
58  
59  
60

1  
2  
3 found. These variables were identified by logistic regression analyses via stepwise backward selection  
4 with  $p > 0.05$  as exclusion criterion. The full number ( $n$ ) of identified patient types were introduced as  
5 independent variables ( $x_i$ ) into the backward selection and the regional category (coded 0/1) was used  
6 as dependent variable ( $y$ ). In the following formula,  $\beta_i$  define the estimated coefficients and  $\alpha$  the  
7 constant:  
8  
9

$$y = \alpha + \sum_{i=1}^n (\beta_i x_i)$$

10  
11  
12 We calculated two models comparing 1) urban areas vs. rural areas and 2) environs vs. rural regions.  
13 An alpha level of 5% ( $p \leq 0.05$ ) was defined as statistically significant.  
14  
15  
16  
17  
18  
19  
20

## 21 **Patient and public involvement**

22  
23 There was no patient and public involvement in the design, conduct, reporting or dissemination of our  
24 research.  
25  
26  
27  
28

## 29 **Results**

### 30 **Sample characteristics**

31  
32 We conducted nine focus groups with 65 GPs. Three focus groups were performed in each area: urban  
33 areas  $n=24$  GPs, environs  $n=19$ , rural areas  $n=22$ . 44 GPs were male. Mean age of the GPs was 54.3  
34 years in urban areas, 50.6 in environs and 55.0 in rural areas. Further descriptions of the focus groups  
35 participants can be found in table 1.  
36  
37  
38  
39

40  
41 In our standardized observational study, we were able to include GPs from 91.9% of the selected  
42 administrative districts (34 of 37) into the data set. In three districts of the region environs  
43 (Delmenhorst, Diepholz and Osterholz) we could not include GPs into our study. From the 280 initially  
44 recruited GPs 211 could be personally interviewed. 69 GPs could not participate due to time-related  
45 or organisational problems (e.g. absence of practice partners, software problems). The description of  
46 the recruitment process, the stratification of groups and a map of the regions can be found in Schäfer  
47 et al. 2020 [3].  
48  
49  
50  
51  
52

53 The characteristics of the interviewed GPs are shown in table 2. 65.4% of the GPs were male, the mean  
54 age was 54.5 years. The GPs reported an average of 344 treated patients per month with a slightly  
55 lower number of patients in urban areas than in rural areas. The most common practice type in all  
56 areas was the individual practice (rural areas: 59.2%, environs: 51.4%, urban areas: 43.9%). GPs  
57 working in medical care centers were only found in urban areas.  
58  
59  
60



## Patient types identified from the focus groups

We derived 4 themes with 27 categories of patient types from the GP focus groups. The identified patient types are presented in table 3. Quotes from the GPs are shown in italics in the following text.

### Patient types classified by morbidity

Theme 1 included patient types classified by morbidity. A frequent category was patients with chronic illness, which was divided into two subtypes. One type is rather well, dutiful, easy to manage and with well-adjusted medication. The other type has a poor compliance and needs a time-consuming treatment.

*“I think the most frequent patient is the stable, chronically ill old patient and the second most often the sick old patient with severe complaints.” (Section 190, urban GP group)*

Another category was patients with multimorbidity. These were characterised by the GPs as presenting regularly with new complaints, having polypharmacy, being in need of patient education and constant treatment adaptations. GPs also described a high expenditure of time for the treatment of patients with multimorbidity.

*„So [...] really common is the chronically ill old patient, [who] keeps coming up with new symptoms because the joints are damaged, pain occurs again, the medication is not taken properly or is stopped because of some side effects, which are often very, how to say, 'wailing' you cannot say, but are very plaintive. [...] So that's tiring.” (Section 206, urban GP group)*

Another group of patients that many GPs consider to be common in their practice are patients with psychiatric disorders, e.g. burnout, depression, anxiety or borderline disorders. According to the GPs, mental disorders often occur as a comorbidity of somatic diseases. The treatment of these psychiatric disorders is often stressful because the patients need long and frequent conversations, many of them repeatedly consult the GP with the same symptoms and some patients have no insight into the disease. From the GPs' view another frequently encountered patient group were patients with somatoform disorders. These included e.g. patients with unclear chest, abdominal or whole body pain or patients with irritable bowel syndrome. The treatment of these patients and the clarification of their symptoms is time-consuming. GPs reported that it is difficult to convey to the patient that the complaints are not based on an organic cause. GPs also reported that there are many people with dementia among their older patients. The contact with relatives or caregivers plays a major role in the treatment of these patients. Moreover, some GPs have described patients with substance abuse disorders who are dependent on alcohol, medication such as painkillers or sleeping pills, or illegal drugs as a common patient type. For some GPs caring for this patient group is

1  
2  
3 stressful due to frequent and time consuming consultations. In addition, requests for prescriptions  
4 often have to be refused.  
5

#### 6 7 Patient types classified by sociodemographic characteristics 8

9  
10 Theme 2 summarized patient types according to sociodemographic characteristics. GPs mentioned  
11 that they have patients with social problems due to poverty/low income and educationally  
12 disadvantaged patients with low health literacy. These two patient types needed more time-  
13 consuming advice and management. From the perspective of the GPs many patients who are  
14 affected by poverty struggle with addiction and mental problems and/or poor health conditions. In  
15 contrast, GPs reported another category typically for the sociodemographic cluster: privately insured  
16 patients. GPs described them as very demanding.  
17

18  
19  
20  
21  
22 *„I saw in [place in Schleswig-Holstein], [...] the community, I think, got three huge containers of dirt  
23 out of this [...] house. It was horrible. And then she sued the communit. After that nobody dared to  
24 help her again. And unfortunately we see her in the emergency service with a regularity. This is  
25 sometimes very appalling and is becoming more frequent, even in areas where you don't think it's  
26 possible.“ (Section 223, rural GP group)*

27  
28 *„This is more a, actual a claim. Is probably the same as with patients with a lot of money. The private  
29 patient assumes that he basically finances the entire practice with his doctor-patient contact or visit.“  
30 (Section 252, environs GP group)*

31  
32 GPs reported that patients with migration background sometimes have very different disease  
33 concepts. Some patients, e.g. Turkish-born patients, have a different understanding of the disease  
34 than other patients due to their origin or culture. This could lead to difficulties in clarifying  
35 symptoms and the assessment of treatment urgency and intensity. GPs needed more time for these  
36 patients. The described problems concern the category patients with migration background and  
37 communication problems as well.  
38

39  
40  
41  
42 *„What I find exciting in these groups, what sometimes makes it easier for me e.g. we have quite a lot  
43 Polish pickers with us. Polish pain is very much the same as German pain. So i.e. when [a] Pole says  
44 'my leg hurts'. Then I know roughly how his leg hurts. I don't know about Turkish pain. This [...] is really  
45 a problem. So I know that my Turkish patients get disproportionately more painkillers and more  
46 antibiotics from me and I can't get it, although I know it. I can't reduce it because I fail because of the  
47 language barrier and the way they describe the pain and I can't get it any other way.“ (Section 312,  
48 rural GP group)*

49  
50 Further patient categories in this theme were minors accompanied by their parents and minors who  
51 come alone for consultation. These two groups seemed to be rather less common in the GP  
52 practices. Urban GPs reported that children from urban areas were mainly treated by the  
53 paediatrician. Rural GPs described that they treated also children particularly when the paediatrician  
54 practices were very crowded.  
55  
56  
57

#### 58 59 Patient types classified by specific care needs 60

Theme 3 comprised patients with specific care needs. GPs described patients with other social problems e.g. marital problems, loneliness or workplace bullying. Especially patients suffering from loneliness influenced the GP practice routine. They came without a special reason for consultation and used the waiting areas for social contacts with other people.

*„So, I think it's more of a social problem than a medical problem. That is why they are so often in the clinic. There they meet people. They usually live alone and have some social contact there and can just talk.“ (Section 80, rural GP group)*

Patients regularly needing home visits, patients living in a nursing home or senior citizens living on their own without caregivers had in common that they required an additional treatment effort. GPs took responsibility for their older patients and they have to organize their medical treatment which led to a higher workload.

*„We just have the very few old people in the nursing home. They have no relatives at all. Nobody cares anymore. Yes [...] so that we no longer have any contact persons even in help so.“ (Section 1091, urban GP group)*

*„Sometimes the children are far away and there are often very brave old women who really managed it alone for years. Giant garden, huge house and all that. Then it just doesn't work anymore, but they don't want to. Very, very difficult to find a satisfactory solution for everyone, right?“ (Section 244-246, rural GP group)*

Patients who are caregivers themselves were described as a vulnerable group with a need of psychosocial support and a higher risk of developing health problems due to the exhausting care situation.

*„So some caring relatives do it very well and you have to treat them too, because they can also get exhausted and there are very nice circumstances and just terrible ones.“ (Section 206, rural GP group)*

This theme also included struggling single parents. According to the GPs this group deserves special attention. Mothers who care for their children alone in addition to a job were overworked, this complicated the treatment and has a negative effect on their health status.

*GP A: "As a group of people, I can still think of the group of single mothers [...]."*

*GP B: "Overworked, clearly. Overworked and have problems everywhere. [...] Whatever they do, it will always be [a] problem. "*

*GP A: "Yes, it is very difficult, so because there are quite a lot of them here and I think that their situation is quite understandable." (Section 202 - 204, urban GP group)*

#### Patient characteristics classified by patient behaviour

Theme 4 classified patient types on the basis of common behaviours. Among them are patients who present for consultation bringing along a self-diagnosis obtained via different media. Some of these patients had a clear idea of what they have, what they need and what the GP has to do. These contacts were time consuming, but some of these patients were in a positive way well informed.

*„I would differentiate the internet patients again, because I think there are the ones who are really so annoying and are hypochondriacal in some way. But [...] others [...] are [...] uncomfortable for us*

1  
2  
3 *because they often really know details better than we do, because they deal with certain things that*  
4 *we have already neglected in routine or [things] we are no longer up to date with.” (Section 160, rural*  
5 *GP group)*  
6

7 A frequently described patient group was the patients with poor therapy adherence. The GPs  
8 complained that these patients do not follow their recommended lifestyle changes e.g. healthy  
9 nutrition, physical education, restrictions in smoking and drinking behaviour or medication  
10 intake. Working with these patients was very frustrating for the GPs. The most frequent  
11 mentioned patient group was the demanding patients. These patients had high expectations  
12 towards their GP. They asked for special services e.g. prolonged sickness certificates,  
13 inappropriate medication, physiotherapy or massages.  
14

15  
16  
17  
18  
19 *„The orthopaedic surgeon had no time. He could somehow protect himself and then they end*  
20 *up with us and "I brought something with me what does that mean"? Than you really notice,*  
21 *you somehow got a ball in your goal.” (Section 207, urban GP group)*  
22

23 Two patient categories can be summarized as high users: patients who had at least one  
24 consultation per week and patients who regularly make excessive demands on GP’s time during  
25 the consultation. These patients consume a lot resources of the GP and their practice  
26 management.  
27  
28

29  
30 *„So, there really are patients who are up to twenty times a quarter. [...] Well, they always have*  
31 *a reason. So, [...] if it's medication, medication questions, blood sampling, interpretation of*  
32 *results. Then they come from the specialists in order to interpret their results, because that*  
33 *obviously doesn't take place there. I do not know. Or [because] you want to hear something*  
34 *about it again.” (Section 77 - 79, rural GP group)*  
35

36 *„These are the ones that are actually scheduled with a quarter of an hour and that just consume*  
37 *45 minutes regularly and where it is sometimes difficult to slow them down. Often they really*  
38 *have something. Sure, if it's a tumour patient, you can't him ... or if you want to discuss bullying*  
39 *at work for the first time, then you can't get rid of them for a moment. But there are some*  
40 *patients where you know in advance that they basically have nothing and still need three*  
41 *quarters of an hour.”(Section 139, environs GP group)*  
42

43 Another category concerning patient’s behaviour reported by the GPs were patients who  
44 proactively consult additional specialists or different GPs for the same problem. This behaviour  
45 could be also called “doctor (s)hopping”. Patients change their GPs or other specialists until they  
46 get the desired medication or diagnosis.  
47  
48

49 *„Also the doctor hoppers, who had maybe seven doctors as general practitioners within a year.*  
50 *And say, 'Oh, we've heard so much beautiful from you'. But they say that to everyone, we know*  
51 *that, we all know that.” (Section 174, rural GP group)*  
52

53 Theme 4 contained besides these predominantly demanding patients also the regular patients  
54 of the practice. GPs reported that they know many of their regular patients well and the  
55 treatment of patients with a long doctor-patient-relationship is often very satisfying.  
56  
57

58 *„But there are also many close [patients] who have been with you for years and who actually*  
59 *appreciate the experience of the doctor and thus put themselves in my hand, I would also say. If*  
60

1  
2  
3           *you've known them for a long time, a lot actually. Where there is a good relationship of trust,*  
4           *where you can also say clear words, but they are not angry afterwards.” (Section 155, rural GP*  
5           *group)*  
6

## 7           **Frequencies and regional differences of patient types**

8  
9           The relative frequency of consultation by the 27 categories of patient types in the total sample,  
10           urban areas, environs and rural areas is shown in table 4. Percentages relate to all patients seen  
11           in the practices and are averaged across all GPs interviewed, in the total sample as well as in  
12           the specified regions respectively. The most common patient types were, besides the “regular  
13           patients of the practice” (85.2%), “patients with a chronic illness” (57.7%) and – probably largely  
14           overlapping with this category – “patients with multimorbidity” (45.9%). In bivariate analyses,  
15           many patient types had a higher frequency in urban areas compared to rural areas. The biggest  
16           differences were found for “patients with psychiatric disorders” (19.2% in urban areas vs. 12.5%  
17           in rural areas), “educationally disadvantaged patients with low health literacy” (15.8% vs. 9.1%),  
18           and “senior citizens living on their own without caregivers” (16.0% vs. 11.2%). In contrast,  
19           “minors accompanied by their parents” was the only patient type significantly higher stated in  
20           rural areas (3.1% vs. 6.3%).  
21  
22

23           The results of the two logistic regression models are shown in the tables 5 and 6. Five patient  
24           types were identified by the first stepwise backward selection to be more prevalent in urban  
25           areas than in rural areas. The highest odds ratios were found for “patients with migration  
26           background and culturally different disease concepts” (odds Ratio: 1.23; 95% confidence  
27           interval: 1.06-1.42), “privately insured patients” (1.17; 1.05-1.31) and “educationally  
28           disadvantaged patients with low health literacy” (1.11; 1.04-1.19). Three patient types were  
29           identified to be less prevalent in urban areas than in rural areas. These included “minors  
30           accompanied by their parents” (0.71; 0.61-0.83), “patients with poor therapy adherence” (0.87;  
31           0.80-0.95) and “patients with dementia” (0.90; 0.82-0.99). The second stepwise backwards  
32           selection revealed two categories being more prevalent in environs than in rural areas:  
33           “Privately insured patients” (1.10; 1.03-1.18), “patient who proactively consult additional  
34           specialists for the same problem” (1.06; 1.01-1.12) and one being less prevalent in environs:  
35           “patients who are caregivers” (0.91; 0.83-0.99).  
36  
37  
38  
39  
40  
41  
42  
43  
44  
45  
46  
47  
48  
49  
50  
51  
52  
53

## 54           **Discussion**

### 55           **Main findings**

56  
57  
58  
59  
60

1  
2  
3 We derived 27 categories of patient types from the GP focus groups. This patient types could be  
4 assigned to four themes: morbidity, sociodemographic characteristics, specific care needs and patient  
5 behaviour. GPs from urban areas deal with higher frequencies of patients with psychiatric, social and  
6 cultural problems. Furthermore, patients with low health literacy, senior citizens living alone and  
7 patients who proactively consult additional specialists were represented more often in urban areas.  
8 Only minors accompanied by their parents were more common in rural areas. The biggest difference  
9 between urban and rural areas were found in five patient types being more prevalent in urban areas  
10 and in three patient types being more prevalent in rural areas.  
11  
12  
13  
14  
15  
16  
17  
18  
19

### 20 **Strengths and limitations**

21 As far as we know this is the first mixed method study exploring patient types in GP practices and  
22 quantifying and comparing the frequencies of these patient types seen in urban, environ and rural GP  
23 practices in northern Germany. In order to maximize the heterogeneity of focus group participants'  
24 experience in the qualitative part of the study, we ensured to include both male and female GPs, with  
25 longer and shorter durations of practice experience, lower and higher age, from smaller and larger  
26 practices and different types of practices from all three areas. Nevertheless, GPs who participated in  
27 the focus groups could differ from non-participants due to their motivation, practice experience and  
28 special problems from their regions. This could possibly have biased our identified patient types.  
29 However, we could include a large variety and high number of focus group participants in our study.  
30 The GPs were exclusively from the regions of northern Germany so that the sample might possibly not  
31 represent the rest of Germany.  
32  
33  
34  
35  
36  
37  
38  
39

40 GP practices had been included via a quota sampling into the quantitative part of the study. 91.9% of  
41 the administrative districts in the survey area could be included and GPs of less favoured areas which  
42 are difficult to reach by public transport, were also represented in the study. We have to contact a  
43 high number of 4956 GPs which revealed a comparatively low participation rate of 4.3% interviewed  
44 GPs. In Quota sampling the participation rate is not important, however, it may still affect the  
45 representativeness of the GP population. Furthermore, we performed a comparison of the data of  
46 study participants in the included regions with the statistics of the German national association of  
47 statutory health insurance physicians [21]. GPs participating in our study had only been slightly older  
48 (urban areas: + 0.9 years; environs: + 0.4 years; rural areas: + 0.6 years) and slightly more often males  
49 than the basic study population of the selected districts (urban areas: + 3.6%; rural areas: + 3.6%).  
50  
51  
52  
53  
54  
55  
56

57 The identification of the patient types took place before the European refugee crisis in Germany  
58 arrived. The measurement of the frequencies of the patient types was carried out during this period  
59  
60

1  
2  
3 (2015-2017). It can be assumed that the refugees have only slowly integrated into the general  
4 practices [22]. Therefore, the patient types “patients with migration background and culturally  
5 different disease concepts” and “patients with migration background and communication problems”  
6 could be nowadays found more frequently in general practices. It could also affect other patient types  
7 like “patients with psychiatric problems”, which are frequently found in the refugee population [23].  
8  
9

10  
11  
12 The contributions of the GPs in the focus groups and the answers in the interviews might have been  
13 influenced by memory gaps, errors or social desirability. The order of the questions of the focus group  
14 guideline may influenced the answers of the GPs regarding the patient types. Before we asked which  
15 kind of patients consult them most often to initiate a discussion about patient types, we asked the  
16 GPs to describe the most common reasons for consultations in their practice, eg, chronic back pain or  
17 acute infections of the respiratory tract. This could have led the discussion in a certain direction.  
18 Nevertheless, we decided the order of the questions to focus in the patient type part on patient  
19 characteristics which describes the behaviour, needs or morbidity of a group of patients and not only  
20 the reasons for consultations in general practice. Our focus group discussions were supported by at  
21 least two experienced moderators out of four (IS, NJP, HH and AS). The interviewers of the quantitative  
22 GP interviews had received substantial training and had been supervised in regular meetings  
23 throughout the entire study period to minimize the interviewer bias. Additionally, it should be noted  
24 that our study had a mixed methods design which combined the advantages of qualitative and  
25 quantitative data.  
26  
27

28  
29  
30 The stepwise variable selection used for identifying significant differences between the regions reacts  
31 sensitively to differences in the distribution of the variables and it is not considered a reliable method  
32 of variable selection [24]. The results from these analyses therefore describe only one possible, but  
33 not necessarily the best solution. Additionally, coefficients resulting from stepwise backward selection  
34 analyses tend to be biased upwards in scale and the probability of false positive results is increased  
35 [25]. For this reasons, these analyses should be interpreted with care and considered as purely  
36 explorative.  
37  
38  
39  
40  
41  
42  
43  
44  
45  
46  
47  
48  
49

## 50 **Comparison with literature and discussion of results**

51  
52  
53 Some studies dealt with the influence of patient characteristics on consultation length or high  
54 frequencies in general practice. Characteristics associated with a higher use of consultation frequency  
55 were among other things female sex, higher age, unemployment, poverty, living alone or isolation,  
56 but regional differences of the distribution of these patient characteristics were regularly not  
57 considered [26–29]. Carr-Hill et al. found higher rates of consultations for patients living in urban areas  
58  
59  
60

1  
2  
3 [14], whereas a study of Mukhtar et al. did not find significant association for practice rurality status  
4 [13].  
5

6  
7 A German study about differences in the provision of lifestyle counselling for cardiovascular disease  
8 prevention between urban and rural regions reported that rural GPs named more often a lack of  
9 adherence by the patients and urban GPs were more often confronted with patients with a migration  
10 background, communication problems and culturally different disease concepts as well [30]. We were  
11 able to confirm these results in our study.  
12  
13

14  
15 GPs from urban areas more often deal with language problems and culturally different disease  
16 concepts due to higher proportions of patients with migration background in cities [30, 31].  
17 Furthermore GPs from urban areas of our study reported higher frequencies of patients with  
18 psychiatric disorders. Two reviews about urban-rural differences in depression showed similar results  
19 for the most reviewed studies as well. However, studies conducted in China revealed higher  
20 prevalence of depression among rural residents [32, 33]. Breslau et al. used a large nationally  
21 representative sample from the United States and suggest that the prevalence of mental disorders did  
22 not differ between urban and rural areas [34]. Other studies reported a higher prevalence of  
23 psychiatric disorders in urban areas [35–38]. Poor mental health is associated with poverty as well as  
24 migration [39, 40]. Our previous paper about the regional differences in reasons for consultation and  
25 GP's service spectrum showed higher frequencies of social problems and psychosomatic basic care for  
26 patients in urban areas [3]. This accumulation of psychosocial patient problems in urban areas  
27 represents a big challenge for urban GPs.  
28  
29  
30  
31  
32  
33  
34  
35  
36  
37

38 The here presented study found a significant negative association between urban areas and rural areas  
39 for patients with dementia. Koller et al. reported regional variations between urban and rural patients  
40 with dementia concerning the specialist treatment after the incident diagnosis of dementia. While  
41 urban patients more often consult neurologists and psychiatrists (NPs) in the year before and after  
42 the initial dementia diagnosis, rural patients tend to contact their primary care physicians more often  
43 but NPs less often [41]. This means a higher workload for rural GPs as regards the treatment of patients  
44 with dementia.  
45  
46  
47  
48  
49

50 Our study revealed higher frequencies of minors accompanied by their parents in GP practices in rural  
51 areas. Another study from Germany arrived at the same result. 13.5% of family practices from major  
52 cities provided care for infants compared to 26.5% of surgeries in medium-sized towns and 37.5% in  
53 small towns or rural areas [42].  
54  
55  
56  
57  
58  
59  
60

### **Implications for research and clinical practice**



1  
2  
3 An analysis of the Zi-practice-panel (ZiPP) from the Central Research Institute of Ambulatory Health  
4 Care in Germany (Zi) in 2015 showed a higher income for GPs from rural areas than urban areas in  
5 Germany. The main reason was the size of the practices. Rural GPs treated 1161 patients in the fourth  
6 quarter of 2015, while their colleagues in the city treated 1047 patients. Furthermore, the rural GPs  
7 worked 2 hours per week more than the urban GPs [43]. Our study also showed that the GPs from  
8 urban areas treated less patients than their colleagues from rural areas. However, they managed  
9 higher frequencies of patients with psychiatric, social and culturally problems which can be very  
10 complex and time consuming. In addition, urban GPs often just act as a providers of medical services  
11 [8] and their patients have a lower commitment [44]. Further research is needed to explore these  
12 differences particularly related to the entire German territory.

13  
14  
15  
16  
17  
18  
19  
20  
21 The identified regional differences should also be included as learning content in the training of  
22 medical students and young GPs. In Germany the training of GPs is regulated by the respective  
23 regulations on continuing medical education of the federal states [45]. This results in a great variety  
24 and legal differences in the federal states. These trainings include the identified problems as  
25 psychosomatic primary care, addiction therapy or social medicine but to our knowledge they do not  
26 focus on regional differences [46]. The Baden-Württemberg General Practice Competence Center has  
27 developed Germany's first competence-based curriculum for general practice training assistants. GPs  
28 and the German College of General Practitioners and Family Physicians (DEGAM) were involved [47].  
29 This curriculum does not include either the topic regional differences of patient types in general  
30 practice. Future revisions of these curricula should consider these regional differences.

31  
32  
33  
34  
35  
36  
37  
38  
39  
40  
41  
42  
43  
44  
45  
46  
47  
48  
49  
50  
51  
52  
53  
54  
55  
56  
57  
58  
59  
60  
Future GPs could compensate the specific needs of their patient clientele with medical training aligned  
with the requirements of the region. For example, the training for GPs from urban areas should put  
an emphasis on the treatment of patients with psychiatric, social and cultural problems. Whereas rural  
GPs need advanced skills regarding the care for children or incontinent patients. Generally, GPs from  
all regions should be better prepared to address the problems with the worst outcomes, because the  
differences in the frequencies of topics like psychiatric disorders, poor therapy adherence,  
hypochondria or drug abuse could also mean that these problems are less talked about or less  
identified in rural areas. Adjusting the training of GPs accordingly could facilitate a better response to  
these regional challenges in health care.

### **Additional files**

Additional file 1: Questionnaire on patient types

### **List of abbreviations**

DEGAM: German Association of General Medicine and Family Medicine; GP: General practitioner; NPS: neurologists and psychiatrists; ZiPP: Zi-practice-panel;

### **Declarations**

#### **Ethics approval and consent to participate**

The study was approved by the Ethics Commission of the Hamburg Medical Association on 12 August 2013 (file number PV 4535). All study participants gave their written informed consent prior to their participation in the study.

#### **Availability of data and material**

The ethics approval does not allowed data sharing.

#### **Authors' information**

HH, certified health scientist, Dr. rer. hum. biol. (PhD); IS, certified sociologist, Dr. phil. (PhD); NJP, certified psychologist, Dr. rer. hum. biol. (PhD); AK, certified health scientist; HHa, certified ecotrophologist; DL, MD, Dr. med. (PhD); MS, GP, MD, professor

#### **Competing interests**

The authors declare that they have no competing interests.

#### **Funding**

The study was supported by the Hamburg and Schleswig-Holstein Association of Statutory Health Insurance Physicians (grant number KVHH-KVSH-2015/1). The funding body had no role in the design of the study and collection, analysis, and interpretation of data and in writing the manuscript.

#### **Authors' contributions**

MS, IS, NJP and HH conceived and designed the study. HH, NJP and IS facilitated the focus groups and analysed qualitative data. IS analysed the quantitative data. DL, AK and HHa significantly contributed to the study design and/or discussion of the study results. HH and IS drafted the manuscript. All the authors commented on the draft and read and approved the final version of the manuscript.

## Acknowledgement

We would like to express our appreciation to the numerous GPs who facilitated this study with their participation and Anne Stark for filling in as moderator of focus groups in times of need. We also like to thank Linda Krause and Eik Vettorazzi for statistical advice.

## Open Access

This is an Open Access article distributed in accordance with the Creative Commons Attribution Non Commercial (CC BY-NC 4.0) license, which permits others to distribute, remix, adapt, build upon this work noncommercially, and license their derivative works on different terms, provided the original work is properly cited and the use is non-commercial. See: <http://creativecommons.org/licenses/by-nc/4.0/>

## REFERENCES

- 1 Albrecht M, Etgeton S, Ochmann RR. Faktencheck Gesundheit - Regionale Verteilung von Arztsitzen (Ärztedichte) - Haus-, Kinder-, Frauen- und Augenärzte. Available at: [https://www.bertelsmann-stiftung.de/fileadmin/files/BSt/Publikationen/GrauePublikationen/GP\\_Faktencheck\\_Gesundheit\\_Aerztedichte.pdf](https://www.bertelsmann-stiftung.de/fileadmin/files/BSt/Publikationen/GrauePublikationen/GP_Faktencheck_Gesundheit_Aerztedichte.pdf) Accessed March 18, 2016.
- 2 Weinhold I, Gurtner S. Understanding shortages of sufficient health care in rural areas. *Health Policy* 2014;118(2):201–14. <http://www.sciencedirect.com/science/article/pii/S0168851014001997>.
- 3 Schäfer I, Hansen H, Ruppel T, et al. Regional differences in reasons for consultation and general practitioners' spectrum of services in northern Germany – results of a cross-sectional observational study. *BMC Fam Pract* 2020;21(1):1–12. <https://bmcfampract.biomedcentral.com/track/pdf/10.1186/s12875-020-1093-6>.
- 4 Steinhäuser J, Jäkel K, Szecsenyi J, et al. Prozeduren, die in der Allgemeinmedizin durchgeführt werden – eine Querschnittstudie. *Gesundheitswesen* 2017;79(12):1004–11.
- 5 Steinhäuser J, Joos S, Szecsenyi J, et al. A comparison of the workload of rural and urban primary care physicians in Germany: analysis of a questionnaire survey. *BMC family practice* 2011;12:112.

- 1  
2  
3 6 Pochert M, Voigt K, Bortz M, et al. The workload for home visits by German family  
4 practitioners: an analysis of regional variation in a cross-sectional study. *BMC family practice*  
5 2019;20(1):3.  
6  
7 7 Wenghofer EF, Kam SM, Timony PE, et al. Geographic variation in FP and GP scope of practice  
8 in Ontario: Comparative provincial study. *Can Fam Physician* 2018;64(6):e274-e282.  
9 8 Pohontsch NJ, Hansen H, Schäfer I, et al. General practitioners' perception of being a doctor in  
10 urban vs. rural regions in Germany - A focus group study. *Fam Pract* 2018;35(2):209–15.  
11 9 Fenton JJ, Magnan EM, Jerant A, et al. Patient Characteristics Associated with Making Requests  
12 during Primary Care Visits. *The Journal of the American Board of Family Medicine*  
13 2019;32(2):201–08. <https://www.jabfm.org/content/32/2/201>.  
14 10 Ferroni E, Casotto V, Pigato M, et al. Patient and General Practitioner characteristics  
15 influencing the management of non-insulin-treated diabetes mellitus: A cross-sectional study  
16 in Italy. *Diabetes Res Clin Pract* 2016;116:192–201.  
17 11 van den Bussche H, Kaduszkiewicz H, Schäfer I, et al. Overutilization of ambulatory medical  
18 care in the elderly German population?--An empirical study based on national insurance claims  
19 data and a review of foreign studies. *BMC Health Serv Res* 2016;16:129.  
20 12 Collins MM, Bradley CP, O'Sullivan T, et al. Self-care coping strategies in people with diabetes:  
21 a qualitative exploratory study. *BMC Endocr Disord* 2009;9:6.  
22 13 Mukhtar TK, Bankhead C, Stevens S, et al. Factors associated with consultation rates in general  
23 practice in England, 2013-2014: a cross-sectional study. *Br J Gen Pract* 2018;68(670):e370-  
24 e377.  
25 14 Carr-Hill RA, Rice N, Roland M. Socioeconomic determinants of rates of consultation in general  
26 practice based on fourth national morbidity survey of general practices. *BMJ (Clinical research*  
27 *ed.)* 1996;312(7037):1008–12.  
28 15 Creswell JW, Plano Clark VL. Designing and conducting mixed methods research, 2nd edn. Los  
29 Angeles, London, New Dehli, Singapore, Washington DC: Sage 2011.  
30 16 Schäfer I, Hansen H, Pohontsch N, et al. Regional variation of patient behaviour and reasons for  
31 consultation in the general practice of Northern Germany: protocol for an observational study.  
32 *BMJ open* 2016;6(6):e010738. <http://bmjopen.bmj.com/content/6/6/e010738> (accessed 1 Jul  
33 2016).  
34 17 Hansen H, Pohontsch NJ, Bole L, et al. Regional variations of perceived problems in ambulatory  
35 care from the perspective of general practitioners and their patients - an exploratory focus  
36 group study in urban and rural regions of northern Germany. *BMC family practice*  
37 2017;18(1):68. <https://doi.org/10.1186/s12875-017-0637-x> (accessed 3 Apr 2019).  
38 18 BBSR Homepage - Siedlungsstrukturelle Kreistypen - Laufende Raumbewachtung -  
39 Raumbegrenzungen. Available at:  
40 <https://www.bbsr.bund.de/BBSR/DE/Raumbewachtung/Raumbegrenzungen/SiedlungsstrukturelleGebietstypen/Kreistypen/kreistypen.html> Accessed May 27, 2019.  
41 19 Mayring P. Qualitative Inhaltsanalyse: Grundlagen und Techniken. s.l.: Beltz Verlagsgruppe  
42 2010.  
43 20 Potter J, Wetherell M. Discourse and social psychology: Beyond attitudes and behaviour.  
44 London: Sage 1997.  
45 21 Kassenärztliche Bundesvereinigung (KBV). Region 2020.000Z. Available at:  
46 <https://gesundheitsdaten.kbv.de/cms/html/16402.php> Accessed September 29, 2020.726Z.  
47 22 Oltrogge JH, Schäfer I, Schlichting D, et al. Episodes of care in a primary care walk-in clinic at a  
48 refugee camp in Germany - a retrospective data analysis. *BMC family practice* 2020;21(1):193.  
49 23 Belz M, Belz M, Özkan I, et al. Posttraumatic stress disorder and comorbid depression among  
50 refugees: Assessment of a sample from a German refugee reception center. *Transcult*  
51 *Psychiatry* 2017;54(5-6):595–610.  
52 24 Thompson B. Stepwise Regression and Stepwise Discriminant Analysis Need Not Apply here: A  
53 Guidelines Editorial 2016.  
54  
55  
56  
57  
58  
59  
60

- 1  
2  
3 25 Altman DG, Andersen PK. Bootstrap investigation of the stability of a Cox regression model. *Stat Med* 1989;8(7):771–83.
- 4  
5 26 Stevens S, Bankhead C, Mukhtar T, et al. Patient-level and practice-level factors associated with  
6 consultation duration: a cross-sectional analysis of over one million consultations in English  
7 primary care. *BMJ open* 2017;7(11):e018261.
- 8  
9 27 Britt HC, Valenti L, Miller GC. Determinants of consultation length in Australian general  
10 practice. *Med J Aust* 2005;183(2):68–71.
- 11  
12 28 Scaife B, Gill P, Heywood P, et al. Socio-economic characteristics of adult frequent attenders in  
13 general practice: secondary analysis of data. *Fam Pract* 2000;17(4):298–304.
- 14  
15 29 Dreyer K, Steventon A, Fisher R, et al. The association between living alone and health care  
16 utilisation in older adults: a retrospective cohort study of electronic health records from a  
17 London general practice. *BMC Geriatr* 2018;18(1):269.
- 18  
19 30 Görig T, Diehl K, Herr RM, et al. Stadt-Land-Unterschiede im Angebot von Lebensstilberatung  
20 zur Prävention kardiovaskulärer Erkrankungen in der Hausarztpraxis. Ergebnisse einer  
21 bundesweiten Hausärztebefragung. *Gesundheitswesen* 2016;78(8-09):533–38.
- 22  
23 31 Ausländeranteil in Deutschland nach Bundesländern 2018 | Statista 2020. Available at:  
24 [https://de.statista.com/statistik/daten/studie/254889/umfrage/auslaenderanteil-in-](https://de.statista.com/statistik/daten/studie/254889/umfrage/auslaenderanteil-in-deutschland-nach-bundeslaendern/)  
25 [deutschland-nach-bundeslaendern/](https://de.statista.com/statistik/daten/studie/254889/umfrage/auslaenderanteil-in-deutschland-nach-bundeslaendern/) Accessed April 02, 2020.
- 26  
27 32 Sampson L, Ettman CK, Galea S. Urbanization, urbanicity, and depression: a review of the  
28 recent global literature. *Curr Opin Psychiatry* 2020;33(3):233–44.
- 29  
30 33 Purtle J, Nelson KL, Yang Y, et al. Urban-Rural Differences in Older Adult Depression: A  
31 Systematic Review and Meta-analysis of Comparative Studies. *Am J Prev Med* 2019;56(4):603–  
32 13.
- 33  
34 34 Breslau J, Marshall GN, Pincus HA, et al. Are mental disorders more common in urban than  
35 rural areas of the United States? *J Psychiatr Res* 2014;56:50–55.
- 36  
37 35 Paykel ES, Abbott R, Jenkins R, et al. Urban-rural mental health differences in great Britain:  
38 findings from the national morbidity survey. *Psychol Med* 2000;30(2):269–80.
- 39  
40 36 Peen J, Schoevers RA, Beekman AT, et al. The current status of urban-rural differences in  
41 psychiatric disorders. *Acta Psychiatr Scand* 2010;121(2):84–93.
- 42  
43 37 Szöke A, Charpeaud T, Galliot A-M, et al. Rural-urban variation in incidence of psychosis in  
44 France: a prospective epidemiologic study in two contrasted catchment areas. *BMC Psychiatry*  
45 2014;14:78.
- 46  
47 38 Gruebner O, Rapp MA, Adli M, et al. Cities and Mental Health. *Dtsch Arztebl Int*  
48 2017;114(8):121–27.
- 49  
50 39 Kluge U, Rapp MA, Mehran N, et al. Poverty, migration and mental health. *Nervenarzt*  
51 2019;90(11):1103–08.
- 52  
53 40 Fryers T, Melzer D, Jenkins R. Social inequalities and the common mental disorders: a  
54 systematic review of the evidence. Germany 2003 May.
- 55  
56 41 Koller D, Eisele M, Kaduszkiewicz H, et al. Ambulatory health services utilization in patients  
57 with dementia - Is there an urban-rural difference? *Int J Health Geogr* 2010;9:59.
- 58  
59 42 Herrmann W J, Berlt B, Spengler V, et al. Do Family Physicians in Germany Practices Treat  
60 Children and Adolescents? A Representative Survey among Family Practices in Berlin and  
Brandenburg. *Z Allg Med* 2018(94):390–95.
- 43  
44 43 Hausärzte auf dem Land: Höherer Verdienst bei mehr Stunden und höherem Stundensatz  
2020.000Z. Available at: [https://www.zi.de/presse/archiv/pressemitteilungen/2018/31-](https://www.zi.de/presse/archiv/pressemitteilungen/2018/31-oktober-2018/)  
45 [oktober-2018/](https://www.zi.de/presse/archiv/pressemitteilungen/2018/31-oktober-2018/) Accessed May 07, 2020.
- 46  
47 44 Hansen H, Schäfer I, Porzelt S, et al. Regional and patient-related factors influencing the  
48 willingness to use general practitioners as coordinators of the treatment in northern Germany  
49 - results of a cross-sectional observational study. *BMC Fam Pract* 2020;21(1):110.

- 1  
2  
3 45 Fortbildung als immanenter Bestandteil der ärztlichen Tätigkeit 2020+0000. Available at:  
4 <https://www.bundesaerztekammer.de/aerzte/aus-weiter-fortbildung/fortbildung/> Accessed  
5 October 03, 2020.243Z.  
6  
7 46 Fortbildungssuche: Fortbildungsmaßnahmen, die bundesweit für das ärztliche  
8 Fortbildungszertifikat anerkannt sind 2017+0000. Available at:  
9 [https://www.degam.de/files/Inhalte/Degam-](https://www.degam.de/files/Inhalte/Degam-Inhalte/Sektionen_und_Arbeitsgruppen/Sektion_Weiterbildung/Curriculum_01-10-15_neu.pdf)  
10 [Inhalte/Sektionen\\_und\\_Arbeitsgruppen/Sektion\\_Weiterbildung/Curriculum\\_01-10-15\\_neu.pdf](https://www.degam.de/files/Inhalte/Degam-Inhalte/Sektionen_und_Arbeitsgruppen/Sektion_Weiterbildung/Curriculum_01-10-15_neu.pdf)  
11 Accessed October 03, 2020.335Z.  
12 47 Prof. Dr. med. Jost Steinhäuser. Competence-Based Curriculum General Practice 2019.  
13 Available at: [https://www.degam.de/files/Inhalte/Degam-](https://www.degam.de/files/Inhalte/Degam-Inhalte/Sektionen_und_Arbeitsgruppen/Sektion_Weiterbildung/GP%20Curriculum.pdf)  
14 [Inhalte/Sektionen\\_und\\_Arbeitsgruppen/Sektion\\_Weiterbildung/GP%20Curriculum.pdf](https://www.degam.de/files/Inhalte/Degam-Inhalte/Sektionen_und_Arbeitsgruppen/Sektion_Weiterbildung/GP%20Curriculum.pdf)  
15 Accessed October 03, 2020.  
16  
17  
18  
19  
20  
21  
22  
23  
24  
25  
26  
27  
28  
29  
30  
31  
32  
33  
34  
35  
36  
37  
38  
39  
40  
41  
42  
43  
44  
45  
46  
47  
48  
49  
50  
51  
52  
53  
54  
55  
56  
57  
58  
59  
60

For peer review only

## Tables

**Table 1: Description of participating GPs from the focus groups (n=65)**

|                                | Urban areas | Environs   | Rural areas |
|--------------------------------|-------------|------------|-------------|
| Age (in years):                | 54.3 ± 7.7  | 50.6 ± 8.8 | 55.0 ± 9.7  |
| Sex:                           |             |            |             |
| - female                       | 6           | 5          | 10          |
| - male                         | 18          | 14         | 12          |
| Number of patients per month : |             |            |             |
| - up to 250 patients           | 42%         | 5%         | 9%          |
| - 251 patients and more        | 58%         | 95%        | 91%         |
| Years of practice experience:  | 17.4 ± 10.0 | 12.4 ± 9.4 | 15.4 ± 9.2  |
| Type of medical practice:      |             |            |             |
| - individual practice          | 25.0%       | 52.6%      | 50.0%       |
| - group practice               | 54.2%       | 42.1%      | 36.4%       |
| - joint practice               | 20.8%       | 5.3%       | 13.6%       |

**Table 2: Description of the interviewed GPs from the cross-sectional observational study (n=211)**

|                                             | Total                 | Urban areas                                     | Environs             | Rural areas                                     | p (U/R)             | p (E/R) |
|---------------------------------------------|-----------------------|-------------------------------------------------|----------------------|-------------------------------------------------|---------------------|---------|
| Age (in years):                             | 54.5 ± 8.6<br>(n=207) | 53.5 ± 7.8<br>(n=66)                            | 54.7 ± 8.6<br>(n=72) | 55.4 ± 9.2<br>(n=69)                            | 0.190               | 0.630   |
| Sex:                                        |                       |                                                 |                      |                                                 |                     |         |
| - female                                    | 34.6%                 | 45.5%                                           | 27.0%                | 32.4%                                           | 0.117               | 0.479   |
| - male                                      | 65.4%<br>(n=211)      | 54.6%<br>(n=66)                                 | 73.0%<br>(n=74)      | 67.6%<br>(n=71)                                 |                     |         |
| <b><i>Number of patients per month:</i></b> | 344 ± 115<br>(n=207)  | <b><i>314 ± 101</i></b><br><b><i>(n=65)</i></b> | 345 ± 96<br>(n=74)   | <b><i>372 ± 140</i></b><br><b><i>(n=68)</i></b> | <b><i>0.007</i></b> | 0.172   |
| <b><i>Type of medical practice:</i></b>     |                       |                                                 |                      |                                                 |                     |         |
| - <b><i>individual practice</i></b>         | 51.7%                 | <b><i>43.9%</i></b>                             | 51.4%                | <b><i>59.2%</i></b>                             | <b><i>0.004</i></b> | 0.074   |
| - <b><i>group practice</i></b>              | 6.2%                  | <b><i>12.1%</i></b>                             | 6.8%                 | -                                               |                     |         |
| - <b><i>joint practice</i></b>              | 40.8%                 | <b><i>39.4%</i></b>                             | 41.9%                | <b><i>40.9%</i></b>                             |                     |         |
| - <b><i>medical care centre</i></b>         | 1.4%<br>(n=211)       | <b><i>4.6%</i></b><br>(n=66)                    | -<br>(n=74)          | -<br>(n=71)                                     |                     |         |

U/R: comparison "urban areas" vs. "rural areas"; E/R: comparison "environs" vs. "rural areas"  
Statistically significant results ( $p \leq 0.05$ ) are shown in bold and italic

**Table 3: Identified themes and categories of patients types in GP practices from focus groups****Theme 1: Morbidity**

- Patients with a chronic illness
- Patients with multimorbidity (ie, at least 2 chronic diseases)
- Patients with psychiatric disorders (eg, depression, burnout, anxiety, borderline disorder)
- Patients with somatoform disorders
- Patients with dementia
- Patients with substance abuse disorders

**Theme 2: Sociodemographic characteristics**

- Educationally disadvantaged patients with low health literacy
- Privately insured patients (ie, patients who are insured outside of Germany's statutory health insurance system)
- Patients with social problems due to poverty/low income
- Minors accompanied by their parents
- Patients with migration background and culturally different disease concepts
- Patients with migration background and communication problems
- Minors who come to consultation on their own

**Theme 3: Specific care needs**

- Senior citizens living on their own without caregivers
- Patients with other social problems (eg, marital problems, loneliness, workplace bullying)
- Patients regularly needing home visits
- Patients living in a nursing home
- Patients who are caregivers
- Struggling single parents

**Theme 4: Patient behaviour**

- Regular patients of the practice (as opposed to patients who consulted the GP only once or only if the regular GP practice is closed)
- Patients, who come with self-diagnoses via media (eg, internet, magazines, television)
- Patients with poor therapy adherence (eg, regarding medication, lifestyle changes)
- Demanding patients (eg, patients requesting prolonged sick certificates, inappropriate medication or physiotherapy)
- Patients who regularly make excessive demands on GP's time
- Patients who proactively consult additional specialists for the same problem
- Frequent attenders (ie, at least one consultation per week)
- Patients who proactively consult different GPs because of the same problem



**Table 4: Relative frequencies of the consultations by categories of patient types in GP practices divided by region<sup>MA</sup>**

|                                                                                       | Total<br>(n=210) | Urban<br>areas<br>(n=65) | Environs<br>(n=74) | Rural<br>areas<br>(n=71) | p (U/R)          | p (E/R)      |
|---------------------------------------------------------------------------------------|------------------|--------------------------|--------------------|--------------------------|------------------|--------------|
| <b>Theme 1: Morbidity</b>                                                             |                  |                          |                    |                          |                  |              |
| - Patients with a chronic illness                                                     | 57.7%            | 57.2%                    | 57.3%              | 58.6%                    | 0.662            | 0.680        |
| - Patients with multimorbidity                                                        | 45.9%            | 47.4%                    | 43.3%              | 47.2%                    | 0.953            | 0.224        |
| - <b>Patients with psychiatric disorders</b>                                          | 14.7%            | <b>19.2%</b>             | 12.8%              | <b>12.5%</b>             | <b>0.002</b>     | 0.839        |
| - Patients with somatoform disorders                                                  | 14.4%            | 15.6%                    | 14.6%              | 13.0%                    | 0.175            | 0.464        |
| - Patients with dementia                                                              | 6.4%             | 5.7%                     | 7.1%               | 6.3%                     | 0.549            | 0.417        |
| - <b>Patients with substance abuse disorders</b>                                      | 5.6%             | <b>7.2%</b>              | 5.2%               | <b>4.5%</b>              | <b>0.017</b>     | 0.441        |
| <b>Theme 2: Sociodemographic characteristics</b>                                      |                  |                          |                    |                          |                  |              |
| - <b>Educationally disadvantaged patients with low health literacy</b>                | 10.9%            | <b>15.8%</b>             | 8.4%               | <b>9.1%</b>              | <b>0.004</b>     | 0.666        |
| - <b>Privately insured patients</b>                                                   | 8.4%             | 9.3%                     | <b>9.4%</b>        | <b>6.6%</b>              | 0.074            | <b>0.007</b> |
| - <b>Patients with social problems due to poverty/low income</b>                      | 5.9%             | <b>8.7%</b>              | 4.2%               | <b>5.3%</b>              | <b>0.020</b>     | 0.270        |
| - <b>Minors accompanied by their parents</b>                                          | 4.8%             | <b>3.1%</b>              | 5.0%               | <b>6.3%</b>              | <b>&lt;0.001</b> | 0.139        |
| - <b>Patients with migration background and culturally different disease concepts</b> | 3.9%             | <b>6.5%</b>              | 3.0%               | <b>2.5%</b>              | <b>&lt;0.001</b> | 0.492        |
| - <b>Patients with migration background and communication problems</b>                | 3.5%             | <b>5.6%</b>              | 2.6%               | <b>2.6%</b>              | <b>0.002</b>     | 0.962        |
| - Minors who come to consultation on their own                                        | 3.0%             | 2.7%                     | 3.4%               | 2.8%                     | 0.928            | 0.270        |
| <b>Theme 3: Specific care needs</b>                                                   |                  |                          |                    |                          |                  |              |
| - <b>Senior citizens living on their own without caregivers</b>                       | 13.2%            | <b>16.0%</b>             | 12.7%              | <b>11.2%</b>             | <b>0.034</b>     | 0.401        |
| - <b>Patients with other social problems</b>                                          | 9.2%             | <b>12.5%</b>             | 7.4%               | <b>8.1%</b>              | <b>0.021</b>     | 0.579        |
| - Patients regularly needing home visits                                              | 8.7%             | 8.4%                     | 8.3%               | 9.5%                     | 0.370            | 0.277        |
| - Patients living in a nursing home                                                   | 8.1%             | 7.8%                     | 7.9%               | 8.6%                     | 0.553            | 0.642        |
| - Patients who are caregivers                                                         | 4.8%             | 5.2%                     | 4.2%               | 5.0%                     | 0.739            | 0.356        |
| - Struggling single parents                                                           | 4.3%             | 4.9%                     | 3.9%               | 4.2%                     | 0.469            | 0.719        |
| <b>Theme 4: Patient behaviour</b>                                                     |                  |                          |                    |                          |                  |              |
| - Regular patients of the practice                                                    | 85.2%            | 83.3%                    | 86.0%              | 86.1%                    | 0.245            | 0.969        |
| - Patients, who come with self-diagnoses via media                                    | 13.2%            | 14.1%                    | 13.6%              | 11.8%                    | 0.308            | 0.408        |
| - Patients with poor therapy adherence                                                | 11.3%            | 9.2%                     | 12.7%              | 11.9%                    | 0.135            | 0.722        |
| - Demanding patients                                                                  | 11.1%            | 11.0%                    | 11.0%              | 11.2%                    | 0.926            | 0.920        |
| - Patients who regularly make excessive demands on GP's time                          | 7.6%             | 9.5%                     | 7.6%               | 6.0%                     | 0.086            | 0.301        |
| - <b>Patients who proactively consult additional specialists for the same problem</b> | 6.7%             | <b>7.5%</b>              | <b>7.8%</b>        | <b>4.7%</b>              | <b>0.008</b>     | <b>0.016</b> |
| - Frequent attenders                                                                  | 6.0%             | 5.7%                     | 5.4%               | 6.8%                     | 0.537            | 0.434        |
| - Patients who proactively consult different GPs because of the same problem          | 2.7%             | 2.8%                     | 3.0%               | 2.3%                     | 0.435            | 0.375        |

1  
2  
3  
4  
5  
6  
7  
8  
9  
10  
11  
12  
13  
14  
15  
16  
17  
18  
19  
20  
21  
22  
23  
24  
25  
26  
27  
28  
29  
30  
31  
32  
33  
34  
35  
36  
37  
38  
39  
40  
41  
42  
43  
44  
45  
46

U/R: comparison „urban areas“ vs. „rural areas“; E/R: comparison „environs“ vs. „rural areas“; <sup>MA</sup>: Multiple answers permitted; Statistically significant results ( $p \leq 0.05$ ) are shown in bold and italic

For peer review only

**Table 5: Association between the frequencies of the consultations of categories of patient types in GP practices and urban areas vs. rural areas: results of a logistic regression**

| <b>urban areas vs. rural areas</b>                                           | <b>OR</b> | <b>95% CI</b> | <b>p</b> |
|------------------------------------------------------------------------------|-----------|---------------|----------|
| Minors accompanied by their parents                                          | 0.71      | 0.61 to 0.83  | <0.001   |
| Privately insured patients                                                   | 1.17      | 1.05 to 1.31  | 0.005    |
| Patients with poor therapy adherence                                         | 0.87      | 0.80 to 0.95  | 0.002    |
| Senior citizens living on their own without caregivers                       | 1.05      | 1.01 to 1.09  | 0.014    |
| Educationally disadvantaged patients with low health literacy                | 1.11      | 1.04 to 1.19  | 0.001    |
| Patients with psychiatric disorders                                          | 1.07      | 1.02 to 1.12  | 0.011    |
| Patients with dementia                                                       | 0.90      | 0.82 to 0.99  | 0.036    |
| Patients with migration background and culturally different disease concepts | 1.23      | 1.06 to 1.42  | 0.007    |

**Table 6: Association between the frequencies of the consultations of categories of patients types in GP practices and environs vs. rural areas: results of a logistic regression**

| <b>environs vs. rural areas</b>                                              | <b>OR</b> | <b>95% CI</b> | <b>p</b> |
|------------------------------------------------------------------------------|-----------|---------------|----------|
| Patients who are caregivers                                                  | 0.91      | 0.83 to 0.99  | 0.022    |
| Privately insured patients                                                   | 1.10      | 1.03 to 1.18  | 0.005    |
| Patients who proactively consult additional specialists for the same problem | 1.06      | 1.01 to 1.12  | 0.024    |

## Additional file 1: Questionnaire on patient types

**HA24 How many patients do you see in an average week during your consultation including home visits (no overcrowded weeks, no below average weeks, no flu season)?**

patients

**HA25 How many patients you see in an average week ... (estimated in absolute numbers, the sum need not be the sum of HA24)**

belong to your regular patient base (no representation / emergency patients)

are privately insured patients

have a chronic illness

have multimorbidity (at least two chronic diseases)

have a substance abuse disorder

have a psychiatric disorder (e.g. depression, burnout, anxiety, borderline disorder)

have dementia

have a somatoform disorders (e.g. unclear pain, irritable bowel)

have a culturally different disease concept due to migration background

have communication problems due to migration background

have social problems due to poverty/low income

are patients with other social problems (e.g. marital problems, loneliness, workplace bullying)

are educationally disadvantaged patients with low health literacy

come with self-diagnoses via media (e.g. internet, magazines, television)

are struggling single parents

are children (under the age of 18) accompanied by their parents

are children (under the age of 18) who come to consultation on their own

are senior citizens living in their own without caregivers

are patients who are caregivers

1  
2  
3  
4 [ ] [ ] [ ] are patients who need regular home visits

5  
6 [ ] [ ] [ ] are patients living in nursing home

7  
8 [ ] [ ] [ ] are demanding patients (e.g. patients requesting prolonged sick certificates,  
9 inappropriate medication or physiotherapy)

10  
11 [ ] [ ] [ ] are patients with poor therapy adherence (eg, regarding medication, lifestyle changes)

12  
13 [ ] [ ] [ ] are patients who come to the general practitioner at least one consultation per week

14  
15 [ ] [ ] [ ] are patients who regularly make excessive demands on GP's time

16  
17 [ ] [ ] [ ] are patients who proactively consult different GPs because of the same problem

18  
19 [ ] [ ] [ ] are patients who proactively consult additional specialists for the same problem  
20  
21  
22  
23  
24  
25  
26  
27  
28  
29  
30  
31  
32  
33  
34  
35  
36  
37  
38  
39  
40  
41  
42  
43  
44  
45  
46  
47  
48  
49  
50  
51  
52  
53  
54  
55  
56  
57  
58  
59  
60

Dr. Heike Hansen, Dr. Ingmar Schäfer, Dr. Nadine Janis Pohontsch, Agata Kazek, Hanna Hardt, Dr. Dagmar Lühmann, Prof. Dr. Martin Scherer

## Regional differences in the patient population of general practices in northern Germany - results of a mixed methods study

### STROBE 2007 (v4) checklist of items to be included in reports of observational studies in epidemiology\* Checklist for cohort, case-control, and cross-sectional studies (combined)

| Section/Topic             | Item # | Recommendation                                                                                                                                                                                                                                                                                                                                                                                                                                                         | Reported on page # |
|---------------------------|--------|------------------------------------------------------------------------------------------------------------------------------------------------------------------------------------------------------------------------------------------------------------------------------------------------------------------------------------------------------------------------------------------------------------------------------------------------------------------------|--------------------|
| Title and abstract        | 1      | (a) Indicate the study's design with a commonly used term in the title or the abstract                                                                                                                                                                                                                                                                                                                                                                                 | 1                  |
|                           |        | (b) Provide in the abstract an informative and balanced summary of what was done and what was found                                                                                                                                                                                                                                                                                                                                                                    | 2                  |
| <b>Introduction</b>       |        |                                                                                                                                                                                                                                                                                                                                                                                                                                                                        |                    |
| Background/rationale      | 2      | Explain the scientific background and rationale for the investigation being reported                                                                                                                                                                                                                                                                                                                                                                                   | 4                  |
| Objectives                | 3      | State specific objectives, including any pre-specified hypotheses                                                                                                                                                                                                                                                                                                                                                                                                      | 4-5                |
| <b>Methods</b>            |        |                                                                                                                                                                                                                                                                                                                                                                                                                                                                        |                    |
| Study design              | 4      | Present key elements of study design early in the paper                                                                                                                                                                                                                                                                                                                                                                                                                | 5                  |
| Setting                   | 5      | Describe the setting, locations, and relevant dates, including periods of recruitment, exposure, follow-up, and data collection                                                                                                                                                                                                                                                                                                                                        | 5-6                |
| Participants              | 6      | (a) <i>Cohort study</i> —Give the eligibility criteria, and the sources and methods of selection of participants. Describe methods of follow-up<br><i>Case-control study</i> —Give the eligibility criteria, and the sources and methods of case ascertainment and control selection. Give the rationale for the choice of cases and controls<br><i>Cross-sectional study</i> —Give the eligibility criteria, and the sources and methods of selection of participants | 6                  |
|                           |        | (b) <i>Cohort study</i> —For matched studies, give matching criteria and number of exposed and unexposed<br><i>Case-control study</i> —For matched studies, give matching criteria and the number of controls per case                                                                                                                                                                                                                                                 |                    |
| Variables                 | 7      | Clearly define all outcomes, exposures, predictors, potential confounders, and effect modifiers. Give diagnostic criteria, if applicable                                                                                                                                                                                                                                                                                                                               | 6-7                |
| Data sources/ measurement | 8*     | For each variable of interest, give sources of data and details of methods of assessment (measurement). Describe comparability of assessment methods if there is more than one group                                                                                                                                                                                                                                                                                   | 6-7                |
| Bias                      | 9      | Describe any efforts to address potential sources of bias                                                                                                                                                                                                                                                                                                                                                                                                              | 6-7                |
| Study size                | 10     | Explain how the study size was arrived at                                                                                                                                                                                                                                                                                                                                                                                                                              | 6                  |
| Quantitative variables    | 11     | Explain how quantitative variables were handled in the analyses. If applicable, describe which groupings were chosen and why                                                                                                                                                                                                                                                                                                                                           | 6-7                |

|                          |     |                                                                                                                                                                                                                                                                                                           |                        |
|--------------------------|-----|-----------------------------------------------------------------------------------------------------------------------------------------------------------------------------------------------------------------------------------------------------------------------------------------------------------|------------------------|
| Statistical methods      | 12  | (a) Describe all statistical methods, including those used to control for confounding                                                                                                                                                                                                                     | 6-7                    |
|                          |     | (b) Describe any methods used to examine subgroups and interactions                                                                                                                                                                                                                                       | 6-7                    |
|                          |     | (c) Explain how missing data were addressed                                                                                                                                                                                                                                                               | N/A                    |
|                          |     | (d) <i>Cohort study</i> —If applicable, explain how loss to follow-up was addressed<br><i>Case-control study</i> —If applicable, explain how matching of cases and controls was addressed<br><i>Cross-sectional study</i> —If applicable, describe analytical methods taking account of sampling strategy | 6                      |
|                          |     | (e) Describe any sensitivity analyses                                                                                                                                                                                                                                                                     | N/A                    |
| <b>Results</b>           |     |                                                                                                                                                                                                                                                                                                           |                        |
| Participants             | 13* | (a) Report numbers of individuals at each stage of study—eg numbers potentially eligible, examined for eligibility, confirmed eligible, included in the study, completing follow-up, and analysed                                                                                                         | 8                      |
|                          |     | (b) Give reasons for non-participation at each stage                                                                                                                                                                                                                                                      | 8                      |
|                          |     | (c) Consider use of a flow diagram                                                                                                                                                                                                                                                                        | s. Schäfer et al. 2020 |
| Descriptive data         | 14* | (a) Give characteristics of study participants (eg demographic, clinical, social) and information on exposures and potential confounders                                                                                                                                                                  | 8; table 1 and 2       |
|                          |     | (b) Indicate number of participants with missing data for each variable of interest                                                                                                                                                                                                                       | 8; table 1 and 2       |
|                          |     | (c) <i>Cohort study</i> —Summarise follow-up time (eg, average and total amount)                                                                                                                                                                                                                          |                        |
| Outcome data             | 15* | <i>Cohort study</i> —Report numbers of outcome events or summary measures over time                                                                                                                                                                                                                       |                        |
|                          |     | <i>Case-control study</i> —Report numbers in each exposure category, or summary measures of exposure                                                                                                                                                                                                      |                        |
|                          |     | <i>Cross-sectional study</i> —Report numbers of outcome events or summary measures                                                                                                                                                                                                                        | 12-13, table 4 and 5   |
| Main results             | 16  | (a) Give unadjusted estimates and, if applicable, confounder-adjusted estimates and their precision (eg, 95% confidence interval). Make clear which confounders were adjusted for and why they were included                                                                                              | 12-13                  |
|                          |     | (b) Report category boundaries when continuous variables were categorized                                                                                                                                                                                                                                 | N/A                    |
|                          |     | (c) If relevant, consider translating estimates of relative risk into absolute risk for a meaningful time period                                                                                                                                                                                          | N/A                    |
| Other analyses           | 17  | Report other analyses done—eg analyses of subgroups and interactions, and sensitivity analyses                                                                                                                                                                                                            | N/A                    |
| <b>Discussion</b>        |     |                                                                                                                                                                                                                                                                                                           |                        |
| Key results              | 18  | Summarise key results with reference to study objectives                                                                                                                                                                                                                                                  | 14                     |
| Limitations              | 19  | Discuss limitations of the study, taking into account sources of potential bias or imprecision. Discuss both direction and magnitude of any potential bias                                                                                                                                                | 14                     |
| Interpretation           | 20  | Give a cautious overall interpretation of results considering objectives, limitations, multiplicity of analyses, results from similar studies, and other relevant evidence                                                                                                                                | 14-15                  |
| Generalisability         | 21  | Discuss the generalisability (external validity) of the study results                                                                                                                                                                                                                                     | 15-16                  |
| <b>Other information</b> |     |                                                                                                                                                                                                                                                                                                           |                        |

1  
2  
3  
4  
5  
6  
7  
8  
9  
10  
11  
12  
13  
14  
15  
16  
17  
18  
19  
20  
21  
22  
23  
24  
25  
26  
27  
28  
29  
30  
31  
32  
33  
34  
35  
36  
37  
38  
39  
40  
41  
42  
43  
44  
45  
46

|         |    |                                                                                                                                                               |    |
|---------|----|---------------------------------------------------------------------------------------------------------------------------------------------------------------|----|
| Funding | 22 | Give the source of funding and the role of the funders for the present study and, if applicable, for the original study on which the present article is based | 17 |
|---------|----|---------------------------------------------------------------------------------------------------------------------------------------------------------------|----|

\*Give information separately for cases and controls in case-control studies and, if applicable, for exposed and unexposed groups in cohort and cross-sectional studies.

**Note:** An Explanation and Elaboration article discusses each checklist item and gives methodological background and published examples of transparent reporting. The STROBE checklist is best used in conjunction with this article (freely available on the Web sites of PLoS Medicine at <http://www.plosmedicine.org/>, Annals of Internal Medicine at <http://www.annals.org/>, and Epidemiology at <http://www.epidem.com/>). Information on the STROBE Initiative is available at [www.strobe-statement.org](http://www.strobe-statement.org).

For peer review only



## Consolidated criteria for reporting qualitative studies (COREQ): 32-item checklist

| No                                                     | Item                                        | Guide questions/description                                                                                     | Reported on page/<br>comment             |
|--------------------------------------------------------|---------------------------------------------|-----------------------------------------------------------------------------------------------------------------|------------------------------------------|
| <b>Domain 1:<br/>Research team<br/>and reflexivity</b> |                                             |                                                                                                                 |                                          |
| Personal<br>Characteristics                            |                                             |                                                                                                                 |                                          |
| 1.                                                     | Interviewer/facilitator                     | Which author/s conducted the interview or focus group?                                                          | page 6                                   |
| 2.                                                     | Credentials                                 | What were the researcher's credentials? <i>E.g. PhD, MD</i>                                                     | page 17                                  |
| 3.                                                     | Occupation                                  | What was their occupation at the time of the study?                                                             | page 17                                  |
| 4.                                                     | Gender                                      | Was the researcher male or female?                                                                              | both sexes were<br>involved              |
| 5.                                                     | Experience and training                     | What experience or training did the researcher have?                                                            | page 17                                  |
| Relationship with<br>participants                      |                                             |                                                                                                                 |                                          |
| 6.                                                     | Relationship established                    | Was a relationship established prior to study commencement?                                                     | no                                       |
| 7.                                                     | Participant knowledge of<br>the interviewer | What did the participants know about the researcher? <i>e.g. personal goals, reasons for doing the research</i> | name, institute,<br>topic of discussion: |

| No                            | Item                                  | Guide questions/description                                                                                                                                     | Reported on page/<br>comment               |
|-------------------------------|---------------------------------------|-----------------------------------------------------------------------------------------------------------------------------------------------------------------|--------------------------------------------|
|                               |                                       |                                                                                                                                                                 | regional<br>differences in<br>primary care |
| 8.                            | Interviewer characteristics           | What characteristics were reported about the interviewer/facilitator?<br>e.g. <i>Bias, assumptions, reasons and interests in the research topic</i>             | age, profession                            |
| <b>Domain 2: study design</b> |                                       |                                                                                                                                                                 |                                            |
|                               | Theoretical framework                 |                                                                                                                                                                 |                                            |
| 9.                            | Methodological orientation and Theory | What methodological orientation was stated to underpin the study? e.g. <i>grounded theory, discourse analysis, ethnography, phenomenology, content analysis</i> | page 7                                     |
|                               | Participant selection                 |                                                                                                                                                                 |                                            |
| 10.                           | Sampling                              | How were participants selected? e.g. <i>purposive, convenience, consecutive, snowball</i>                                                                       | page 6                                     |
| 11.                           | Method of approach                    | How were participants approached? e.g. <i>face-to-face, telephone, mail, email</i>                                                                              | page 6                                     |

| No              | Item                         | Guide questions/description                                                              | Reported on page/<br>comment                                                                              |
|-----------------|------------------------------|------------------------------------------------------------------------------------------|-----------------------------------------------------------------------------------------------------------|
| 12.             | Sample size                  | How many participants were in the study?                                                 | page 8                                                                                                    |
| 13.             | Non-participation            | How many people refused to participate or dropped out? Reasons?                          | Page 6; 1910 GPs were invited. 65 GPs were included in the focus groups. Details s. Pohontsch et al. 2018 |
| Setting         |                              |                                                                                          |                                                                                                           |
| 14.             | Setting of data collection   | Where was the data collected? e.g. <i>home, clinic, workplace</i>                        | page 6                                                                                                    |
| 15.             | Presence of non-participants | Was anyone else present besides the participants and researchers?                        | page 7                                                                                                    |
| 16.             | Description of sample        | What are the important characteristics of the sample? e.g. <i>demographic data, date</i> | page 8, table 1                                                                                           |
| Data collection |                              |                                                                                          |                                                                                                           |
| 17.             | Interview guide              | Were questions, prompts, guides provided by the authors? Was it pilot tested?            | pages 6-7                                                                                                 |
| 18.             | Repeat interviews            | Were repeat interviews carried out? If yes, how many?                                    | page 8, 9 focus groups                                                                                    |

| No                                      | Item                           | Guide questions/description                                              | Reported on page/<br>comment |
|-----------------------------------------|--------------------------------|--------------------------------------------------------------------------|------------------------------|
| 19.                                     | Audio/visual recording         | Did the research use audio or visual recording to collect the data?      | page 6                       |
| 20.                                     | Field notes                    | Were field notes made during and/or after the interview or focus group?  | page 7                       |
| 21.                                     | Duration                       | What was the duration of the interviews or focus group?                  | page 6, 120 minutes          |
| 22.                                     | Data saturation                | Was data saturation discussed?                                           | no                           |
| 23.                                     | Transcripts returned           | Were transcripts returned to participants for comment and/or correction? | no                           |
| <b>Domain 3: analysis and findingsz</b> |                                |                                                                          |                              |
| Data analysis                           |                                |                                                                          |                              |
| 24.                                     | Number of data coders          | How many data coders coded the data?                                     | page 7, 3 data coders        |
| 25.                                     | Description of the coding tree | Did authors provide a description of the coding tree?                    | page 23, table 3             |
| 26.                                     | Derivation of themes           | Were themes identified in advance or derived from the data?              | page 7                       |
| 27.                                     | Software                       | What software, if applicable, was used to manage the data?               | page 7, Maxqda               |
| 28.                                     | Participant checking           | Did participants provide feedback on the findings?                       | no                           |

| No        | Item                            | Guide questions/description                                                                                                                 | Reported on page/<br>comment |
|-----------|---------------------------------|---------------------------------------------------------------------------------------------------------------------------------------------|------------------------------|
| Reporting |                                 |                                                                                                                                             |                              |
| 29.       | Quotations presented            | Were participant quotations presented to illustrate the themes / findings?<br>Was each quotation identified? e.g. <i>participant number</i> | pages 8-12                   |
| 30.       | Data and findings<br>consistent | Was there consistency between the data presented and the findings?                                                                          | yes                          |
| 31.       | Clarity of major themes         | Were major themes clearly presented in the findings?                                                                                        | page 8, 4 categories         |
| 32.       | Clarity of minor themes         | Is there a description of diverse cases or discussion of minor themes?                                                                      | pages 8-12                   |
