# Supplementary material for: Regional differences in the patient population of general practices in northern Germany: results of a mixed-methods study
Source: PubMed Central journal article supplement — BMJ Open. 2020 Nov 27;10(11):e041762. doi: 10.1136/bmjopen-2020-041762 (PMC7703430; doi:10.1136/bmjopen-2020-041762), 2020-11-27
Supplement: bmjopen-2020-041762supp001.pdf [file bmjopen-2020-041762supp001.pdf]

## Additional file 1: Questionnaire on patient types

**HA24 How many patients do you see in an average week during your consultation including home visits (no overcrowded weeks, no below average weeks, no flu season)?**

┌ ┌ ┌ ┌ ┌ patients

**HA25 How many patients you see in an average week ...  
(estimated in absolute numbers, the sum need not be the sum of HA24)**

┌ ┌ ┌ ┌ ┌ belong to your regular patient base (no representation / emergency patients)

┌ ┌ ┌ ┌ ┌ are privately insured patients

┌ ┌ ┌ ┌ ┌ have a chronic illness

┌ ┌ ┌ ┌ ┌ have multimorbidity (at least two chronic diseases)

┌ ┌ ┌ ┌ ┌ have a substance abuse disorder

┌ ┌ ┌ ┌ ┌ have a psychiatric disorder (e.g. depression, burnout, anxiety, borderline disorder)

┌ ┌ ┌ ┌ ┌ have dementia

┌ ┌ ┌ ┌ ┌ have a somatoform disorders (e.g. unclear pain, irritable bowel)

┌ ┌ ┌ ┌ ┌ have a culturally different disease concept due to migration background

┌ ┌ ┌ ┌ ┌ have communication problems due to migration background

┌ ┌ ┌ ┌ ┌ have social problems due to poverty/low income

┌ ┌ ┌ ┌ ┌ are patients with other social problems (e.g. marital problems, loneliness, workplace bullying)

┌ ┌ ┌ ┌ ┌ are educationally disadvantaged patients with low health literacy

┌ ┌ ┌ ┌ ┌ come with self-diagnoses via media (e.g. internet, magazines, television)

┌ ┌ ┌ ┌ ┌ are struggling single parents

┌ ┌ ┌ ┌ ┌ are children (under the age of 18) accompanied by their parents

┌ ┌ ┌ ┌ ┌ are children (under the age of 18) who come to consultation on their own

┌ ┌ ┌ ┌ ┌ are senior citizens living in their own without caregivers

┌ ┌ ┌ ┌ ┌ are patients who are caregivers

- ⌋ ⌋ ⌋ ⌋ are patients who need regular home visits
- ⌋ ⌋ ⌋ ⌋ are patients living in nursing home
- ⌋ ⌋ ⌋ ⌋ are demanding patients (e.g. patients requesting prolonged sick certificates, inappropriate medication or physiotherapy)
- ⌋ ⌋ ⌋ ⌋ are patients with poor therapy adherence (eg, regarding medication, lifestyle changes)
- ⌋ ⌋ ⌋ ⌋ are patients who come to the general practitioner at least one consultation per week
- ⌋ ⌋ ⌋ ⌋ are patients who regularly make excessive demands on GP's time
- ⌋ ⌋ ⌋ ⌋ are patients who proactively consult different GPs because of the same problem
- ⌋ ⌋ ⌋ ⌋ are patients who proactively consult additional specialists for the same problem
